# Supplementary material for: The coronavirus proofreading exoribonuclease mediates extensive viral recombination
Source: PubMed Central journal article supplement (PMC7846108; doi:10.1371/journal.ppat.1009226), 2021-01-19
Supplement: ppat.1009226.s007.pdf [file ppat.1009226.s007.pdf]

|                                          | Total Reads                        | Viral Reads                      | Mean % Mapping to Virus ( $\pm$ SEM) |
|------------------------------------------|------------------------------------|----------------------------------|--------------------------------------|
| MERS-CoV                                 | 41272492<br>43952576<br>60016392   | 35144605<br>36874175<br>47902083 | 82.95 $\pm$ 1.61                     |
| SARS-CoV-2                               | 96269559<br>104753240<br>101519351 | 72415125<br>81433589<br>78799665 | 77.48 $\pm$ 0.20                     |
| MHV-WT<br>(infected cell monolayer)      | 76403024<br>72081685<br>72305104   | 45626943<br>42808724<br>42472537 | 59.28 $\pm$ 0.29                     |
| MHV-ExoN(-)<br>(infected cell monolayer) | 74803163<br>80268491<br>81780390   | 12202990<br>12612143<br>14681501 | 16.66 $\pm$ 0.67                     |
| MHV-WT<br>(viral supernatant)            | 32200976<br>50152822<br>35221216   | 30679479<br>47151310<br>33941750 | 95.22 $\pm$ 0.68                     |
| MHV-ExoN(-)<br>(viral supernatant)       | 81636281<br>61064695<br>52274504   | 6170745<br>9606775<br>18688288   | 19.80 $\pm$ 8.37                     |
