# Supplementary material for: The coronavirus proofreading exoribonuclease mediates extensive viral recombination
Source: PubMed Central journal article supplement (PMC7846108; doi:10.1371/journal.ppat.1009226), 2021-01-19
Supplement: ppat.1009226.s008.pdf [file ppat.1009226.s008.pdf]

| Virus       | Mean % Identity | Mean Read Length | Mean Read Quality | Read Length N50 | Total Sequenced Reads | Viral Mapping Reads |
|-------------|-----------------|------------------|-------------------|-----------------|-----------------------|---------------------|
| MERS-CoV    | 85.6            | 773.8            | 8.4               | 1014            | 626548                | 178658              |
| SARS-CoV-2  | 82.2            | 1555.8           | 8.9               | 1952            | 2298107               | 1725862             |
| MHV-WT      | 86.7            | 1175.7           | 9                 | 1678            | 766900                | 102267              |
| MHV-ExoN(-) | 86.8            | 1062.3           | 9.1               | 1483            | 1340286               | 19445               |

| Unique junctions in complete reads | % Junctions confirmed in RNA-seq |
|------------------------------------|----------------------------------|
| 473                                | 89.29                            |
| 181,770                            | 97.97                            |
| 5,273                              | 96                               |
| 195                                | 97.5                             |
