# Supplementary material for: The coronavirus proofreading exoribonuclease mediates extensive viral recombination
Source: PubMed Central journal article supplement (PMC7846108; doi:10.1371/journal.ppat.1009226), 2021-01-19
Supplement: ppat.1009226.s009.pdf [file ppat.1009226.s009.pdf]

| Genome    | Read Start (nt) | Read End (nt) | Read Name                              | Read Length | Count |
|-----------|-----------------|---------------|----------------------------------------|-------------|-------|
| MT02088.1 | 10              | 29691         | 103efdf4-a528-46e3-b5bb-b360e2cae18b;0 | 29681       | 1     |
| MT02088.1 | 11              | 29863         | 41da8a52-cb9e-4969-95eb-5fd13b65584b;0 | 29852       | 1     |
| MT02088.1 | 14              | 29874         | cb66c733-0ad3-493c-8a9f-310bbd96e6fe;0 | 29860       | 1     |
