# Supplementary material for: The coronavirus proofreading exoribonuclease mediates extensive viral recombination
Source: PubMed Central journal article supplement (PMC7846108; doi:10.1371/journal.ppat.1009226), 2021-01-19
Supplement: ppat.1009226.s011.pdf [file ppat.1009226.s011.pdf]

| Position | Mean Diff | 95% CI of diff      | Significant? | Summary | Adjusted p-value |
|----------|-----------|---------------------|--------------|---------|------------------|
| 59       | 0.05466   | 0.03121 to 0.07811  | Yes          | ****    | <0.0001          |
| 64       | 0.2822    | 0.2588 to 0.3057    | Yes          | ****    | <0.0001          |
| 65       | 0.04973   | 0.02628 to 0.07319  | Yes          | ****    | <0.0001          |
| 66       | 0.4556    | 0.4321 to 0.4790    | Yes          | ****    | <0.0001          |
| 67       | 0.2899    | 0.2664 to 0.3134    | Yes          | ****    | <0.0001          |
| 68       | 0.273     | 0.2496 to 0.2965    | Yes          | ****    | <0.0001          |
| 69       | 0.5804    | 0.5569 to 0.6038    | Yes          | ****    | <0.0001          |
| 70       | 0.07626   | 0.05281 to 0.09971  | Yes          | ****    | <0.0001          |
| 71       | 0.1814    | 0.1579 to 0.2048    | Yes          | ****    | <0.0001          |
| 73       | 0.02455   | 0.001092 to 0.04800 | Yes          | *       | 0.0163           |
| 75       | 0.04579   | 0.02234 to 0.06925  | Yes          | ****    | <0.0001          |
| 76       | 0.07531   | 0.05185 to 0.09876  | Yes          | ****    | <0.0001          |
| 475      | 0.0344    | 0.01095 to 0.05786  | Yes          | ****    | <0.0001          |
| 533      | 0.04343   | 0.01998 to 0.06689  | Yes          | ****    | <0.0001          |
| 587      | 0.1043    | 0.08082 to 0.1277   | Yes          | ****    | <0.0001          |
| 659      | 0.03491   | 0.01145 to 0.05836  | Yes          | ****    | <0.0001          |
| 665      | 0.03666   | 0.01320 to 0.06011  | Yes          | ****    | <0.0001          |
| 673      | 0.0301    | 0.006645 to 0.05355 | Yes          | ****    | <0.0001          |
| 701      | 0.0294    | 0.005947 to 0.05285 | Yes          | ****    | <0.0001          |
| 973      | 0.0279    | 0.004444 to 0.05135 | Yes          | ***     | 0.0004           |
| 999      | 0.02884   | 0.005386 to 0.05229 | Yes          | ***     | 0.0001           |
| 1010     | 0.03215   | 0.008699 to 0.05561 | Yes          | ****    | <0.0001          |
| 1041     | 0.06281   | 0.03936 to 0.08627  | Yes          | ****    | <0.0001          |
| 1054     | 0.03512   | 0.01166 to 0.05857  | Yes          | ****    | <0.0001          |
| 1110     | 0.05034   | 0.02689 to 0.07379  | Yes          | ****    | <0.0001          |
| 1250     | 0.02505   | 0.001594 to 0.04850 | Yes          | **      | 0.0095           |
| 1255     | 0.0558    | 0.03234 to 0.07925  | Yes          | ****    | <0.0001          |
| 1276     | 0.04119   | 0.01774 to 0.06465  | Yes          | ****    | <0.0001          |
| 1311     | 0.0288    | 0.005349 to 0.05226 | Yes          | ***     | 0.0001           |
| 1382     | 0.02898   | 0.005525 to 0.05243 | Yes          | ****    | <0.0001          |
| 1422     | 0.0299    | 0.006450 to 0.05336 | Yes          | ****    | <0.0001          |
| 1495     | 0.1915    | 0.1681 to 0.2150    | Yes          | ****    | <0.0001          |
| 1499     | 0.04143   | 0.01798 to 0.06488  | Yes          | ****    | <0.0001          |
| 1501     | 0.09985   | 0.07639 to 0.1233   | Yes          | ****    | <0.0001          |
| 1522     | 0.05009   | 0.02663 to 0.07354  | Yes          | ****    | <0.0001          |
| 1524     | 0.05727   | 0.03382 to 0.08072  | Yes          | ****    | <0.0001          |
| 1559     | 0.04634   | 0.02289 to 0.06980  | Yes          | ****    | <0.0001          |
| 1582     | 0.036     | 0.01254 to 0.05945  | Yes          | ****    | <0.0001          |
| 1583     | 0.03453   | 0.01108 to 0.05799  | Yes          | ****    | <0.0001          |
| 1618     | 0.05413   | 0.03068 to 0.07758  | Yes          | ****    | <0.0001          |
| 1626     | 0.06802   | 0.04457 to 0.09148  | Yes          | ****    | <0.0001          |
| 1627     | 0.04333   | 0.01988 to 0.06678  | Yes          | ****    | <0.0001          |
| 1638     | 0.02453   | 0.001079 to 0.04799 | Yes          | *       | 0.0165           |
| 1696     | 0.02886   | 0.005409 to 0.05232 | Yes          | ***     | 0.0001           |

|      |         |                     |     |      |         |
|------|---------|---------------------|-----|------|---------|
| 1708 | 0.02575 | 0.002298 to 0.04920 | Yes | **   | 0.0044  |
| 1748 | 0.02717 | 0.003713 to 0.05062 | Yes | ***  | 0.0009  |
| 1771 | 0.03418 | 0.01073 to 0.05764  | Yes | **** | <0.0001 |
| 1812 | 0.02863 | 0.005177 to 0.05208 | Yes | ***  | 0.0002  |
| 1864 | 0.04321 | 0.01975 to 0.06666  | Yes | **** | <0.0001 |
| 1865 | 0.0392  | 0.01575 to 0.06266  | Yes | **** | <0.0001 |
| 1868 | 0.02954 | 0.006085 to 0.05299 | Yes | **** | <0.0001 |
| 1872 | 0.05694 | 0.03349 to 0.08040  | Yes | **** | <0.0001 |
| 1875 | 0.02551 | 0.002052 to 0.04896 | Yes | **   | 0.0058  |
| 1973 | 0.02953 | 0.006074 to 0.05298 | Yes | **** | <0.0001 |
| 1975 | 0.04786 | 0.02440 to 0.07131  | Yes | **** | <0.0001 |
| 1976 | 0.032   | 0.008551 to 0.05546 | Yes | **** | <0.0001 |
| 1985 | 0.05401 | 0.03055 to 0.07746  | Yes | **** | <0.0001 |
| 1990 | 0.03363 | 0.01018 to 0.05708  | Yes | **** | <0.0001 |
| 2050 | 0.05444 | 0.03098 to 0.07789  | Yes | **** | <0.0001 |
| 2087 | 0.07132 | 0.04787 to 0.09477  | Yes | **** | <0.0001 |
| 2088 | 0.05707 | 0.03361 to 0.08052  | Yes | **** | <0.0001 |
| 2089 | 0.03114 | 0.007685 to 0.05459 | Yes | **** | <0.0001 |
| 2090 | 0.06635 | 0.04290 to 0.08980  | Yes | **** | <0.0001 |
| 2091 | 0.02583 | 0.002377 to 0.04928 | Yes | **   | 0.004   |
| 2092 | 0.02617 | 0.002719 to 0.04963 | Yes | **   | 0.0028  |
| 2093 | 0.06055 | 0.03709 to 0.08400  | Yes | **** | <0.0001 |
| 2095 | 0.04793 | 0.02448 to 0.07139  | Yes | **** | <0.0001 |
| 2096 | 0.02718 | 0.003730 to 0.05064 | Yes | ***  | 0.0009  |
| 2097 | 0.02561 | 0.002156 to 0.04906 | Yes | **   | 0.0052  |
| 2099 | 0.02632 | 0.002863 to 0.04977 | Yes | **   | 0.0023  |
| 2100 | 0.03315 | 0.009697 to 0.05660 | Yes | **** | <0.0001 |
| 2110 | 0.02781 | 0.004358 to 0.05127 | Yes | ***  | 0.0004  |
| 2171 | 0.04524 | 0.02179 to 0.06870  | Yes | **** | <0.0001 |
| 2172 | 0.03655 | 0.01310 to 0.06001  | Yes | **** | <0.0001 |
| 2173 | 0.1282  | 0.1048 to 0.1517    | Yes | **** | <0.0001 |
| 2174 | 0.08203 | 0.05858 to 0.1055   | Yes | **** | <0.0001 |
| 2237 | 0.02592 | 0.002471 to 0.04938 | Yes | **   | 0.0036  |
| 2268 | 0.03777 | 0.01432 to 0.06123  | Yes | **** | <0.0001 |
| 2270 | 0.04071 | 0.01726 to 0.06417  | Yes | **** | <0.0001 |
| 2271 | 0.02796 | 0.004506 to 0.05141 | Yes | ***  | 0.0003  |
| 2272 | 0.02996 | 0.006505 to 0.05341 | Yes | **** | <0.0001 |
| 2298 | 0.03735 | 0.01389 to 0.06080  | Yes | **** | <0.0001 |
| 2341 | 0.04959 | 0.02614 to 0.07305  | Yes | **** | <0.0001 |
| 2356 | 0.02951 | 0.006060 to 0.05297 | Yes | **** | <0.0001 |
| 2439 | 0.125   | 0.1016 to 0.1485    | Yes | **** | <0.0001 |
| 2520 | 0.02685 | 0.003393 to 0.05030 | Yes | **   | 0.0013  |
| 2525 | 0.02599 | 0.002541 to 0.04945 | Yes | **   | 0.0034  |
| 2533 | 0.04021 | 0.01675 to 0.06366  | Yes | **** | <0.0001 |
| 2536 | 0.02756 | 0.004104 to 0.05101 | Yes | ***  | 0.0006  |

|      |         |                       |     |      |         |
|------|---------|-----------------------|-----|------|---------|
| 2537 | 0.03948 | 0.01603 to 0.06294    | Yes | **** | <0.0001 |
| 2538 | 0.04078 | 0.01733 to 0.06424    | Yes | **** | <0.0001 |
| 2539 | 0.03392 | 0.01047 to 0.05738    | Yes | **** | <0.0001 |
| 2540 | 0.06333 | 0.03987 to 0.08678    | Yes | **** | <0.0001 |
| 2541 | 0.06241 | 0.03896 to 0.08586    | Yes | **** | <0.0001 |
| 2567 | 0.02416 | 0.0007031 to 0.04761  | Yes | *    | 0.0245  |
| 2569 | 0.02974 | 0.006287 to 0.05319   | Yes | **** | <0.0001 |
| 2585 | 0.02378 | 0.0003239 to 0.04723  | Yes | *    | 0.0361  |
| 2593 | 0.03362 | 0.01016 to 0.05707    | Yes | **** | <0.0001 |
| 2594 | 0.02489 | 0.001441 to 0.04835   | Yes | *    | 0.0113  |
| 2599 | 0.06378 | 0.04033 to 0.08723    | Yes | **** | <0.0001 |
| 2600 | 0.05409 | 0.03064 to 0.07755    | Yes | **** | <0.0001 |
| 2608 | 0.06512 | 0.04167 to 0.08858    | Yes | **** | <0.0001 |
| 2609 | 0.03223 | 0.008782 to 0.05569   | Yes | **** | <0.0001 |
| 2611 | 0.03209 | 0.008640 to 0.05555   | Yes | **** | <0.0001 |
| 2617 | 0.0572  | 0.03374 to 0.08065    | Yes | **** | <0.0001 |
| 2668 | 0.04948 | 0.02603 to 0.07294    | Yes | **** | <0.0001 |
| 2669 | 0.02599 | 0.002535 to 0.04944   | Yes | **   | 0.0034  |
| 2686 | 0.02615 | 0.002693 to 0.04960   | Yes | **   | 0.0028  |
| 2704 | 0.05421 | 0.03076 to 0.07767    | Yes | **** | <0.0001 |
| 2723 | 0.03075 | 0.007301 to 0.05421   | Yes | **** | <0.0001 |
| 2763 | 0.03742 | 0.01397 to 0.06087    | Yes | **** | <0.0001 |
| 2764 | 0.03974 | 0.01629 to 0.06320    | Yes | **** | <0.0001 |
| 2766 | 0.026   | 0.002543 to 0.04945   | Yes | **   | 0.0034  |
| 2768 | 0.02489 | 0.001439 to 0.04835   | Yes | *    | 0.0113  |
| 2769 | 0.04089 | 0.01744 to 0.06435    | Yes | **** | <0.0001 |
| 2770 | 0.04233 | 0.01888 to 0.06579    | Yes | **** | <0.0001 |
| 2772 | 0.03667 | 0.01322 to 0.06013    | Yes | **** | <0.0001 |
| 2831 | 0.02354 | 9.117e-005 to 0.04700 | Yes | *    | 0.0457  |
| 2854 | 0.04728 | 0.02383 to 0.07073    | Yes | **** | <0.0001 |
| 2881 | 0.06043 | 0.03698 to 0.08388    | Yes | **** | <0.0001 |
| 2921 | 0.02416 | 0.0007087 to 0.04762  | Yes | *    | 0.0243  |
| 2938 | 0.1296  | 0.1062 to 0.1531      | Yes | **** | <0.0001 |
| 2968 | 0.05794 | 0.03449 to 0.08140    | Yes | **** | <0.0001 |
| 2978 | 0.02965 | 0.006194 to 0.05310   | Yes | **** | <0.0001 |
| 2988 | 0.04055 | 0.01710 to 0.06400    | Yes | **** | <0.0001 |
| 2990 | 0.04159 | 0.01814 to 0.06504    | Yes | **** | <0.0001 |
| 2993 | 0.02417 | 0.0007175 to 0.04762  | Yes | *    | 0.0241  |
| 2994 | 0.02795 | 0.004500 to 0.05141   | Yes | **   | 0.0003  |
| 3075 | 0.05485 | 0.03140 to 0.07831    | Yes | **** | <0.0001 |
| 3076 | 0.0372  | 0.01375 to 0.06066    | Yes | **** | <0.0001 |
| 3105 | 0.0325  | 0.009044 to 0.05595   | Yes | **** | <0.0001 |
| 3106 | 0.05109 | 0.02763 to 0.07454    | Yes | **** | <0.0001 |
| 3113 | 0.03293 | 0.009481 to 0.05639   | Yes | **** | <0.0001 |
| 3140 | 0.02565 | 0.002193 to 0.04910   | Yes | **   | 0.005   |

|      |         |                      |     |      |         |
|------|---------|----------------------|-----|------|---------|
| 3141 | 0.03662 | 0.01317 to 0.06008   | Yes | **** | <0.0001 |
| 3142 | 0.05796 | 0.03450 to 0.08141   | Yes | **** | <0.0001 |
| 3211 | 0.04075 | 0.01729 to 0.06420   | Yes | **** | <0.0001 |
| 3223 | 0.03271 | 0.009252 to 0.05616  | Yes | **** | <0.0001 |
| 3243 | 0.1471  | 0.1237 to 0.1706     | Yes | **** | <0.0001 |
| 3245 | 0.04475 | 0.02130 to 0.06821   | Yes | **** | <0.0001 |
| 3430 | 0.04194 | 0.01848 to 0.06539   | Yes | **** | <0.0001 |
| 3431 | 0.02501 | 0.001553 to 0.04846  | Yes | **   | 0.01    |
| 3438 | 0.02751 | 0.004052 to 0.05096  | Yes | ***  | 0.0006  |
| 3514 | 0.03744 | 0.01399 to 0.06089   | Yes | **** | <0.0001 |
| 3595 | 0.03497 | 0.01152 to 0.05842   | Yes | **** | <0.0001 |
| 3617 | 0.03031 | 0.006861 to 0.05377  | Yes | **** | <0.0001 |
| 3631 | 0.03817 | 0.01472 to 0.06163   | Yes | **** | <0.0001 |
| 3632 | 0.0258  | 0.002347 to 0.04925  | Yes | **   | 0.0042  |
| 3633 | 0.03149 | 0.008032 to 0.05494  | Yes | **** | <0.0001 |
| 3635 | 0.02988 | 0.006425 to 0.05333  | Yes | **** | <0.0001 |
| 3637 | 0.02389 | 0.0004350 to 0.04734 | Yes | *    | 0.0323  |
| 3638 | 0.03211 | 0.008659 to 0.05557  | Yes | **** | <0.0001 |
| 3639 | 0.03832 | 0.01486 to 0.06177   | Yes | **** | <0.0001 |
| 3640 | 0.03325 | 0.009794 to 0.05670  | Yes | **** | <0.0001 |
| 3645 | 0.03157 | 0.008116 to 0.05502  | Yes | **** | <0.0001 |
| 3720 | 0.07776 | 0.05430 to 0.1012    | Yes | **** | <0.0001 |
| 3728 | 0.02383 | 0.0003766 to 0.04728 | Yes | *    | 0.0342  |
| 3729 | 0.03285 | 0.009398 to 0.05630  | Yes | **** | <0.0001 |
| 3737 | 0.04329 | 0.01984 to 0.06675   | Yes | **** | <0.0001 |
| 3738 | 0.0246  | 0.001151 to 0.04806  | Yes | *    | 0.0153  |
| 3739 | 0.1137  | 0.09025 to 0.1372    | Yes | **** | <0.0001 |
| 3747 | 0.03367 | 0.01022 to 0.05713   | Yes | **** | <0.0001 |
| 3748 | 0.04503 | 0.02158 to 0.06848   | Yes | **** | <0.0001 |
| 3749 | 0.02376 | 0.0003099 to 0.04722 | Yes | *    | 0.0366  |
| 3750 | 0.02967 | 0.006215 to 0.05312  | Yes | **** | <0.0001 |
| 3754 | 0.05361 | 0.03016 to 0.07707   | Yes | **** | <0.0001 |
| 3755 | 0.05282 | 0.02937 to 0.07627   | Yes | **** | <0.0001 |
| 3756 | 0.07453 | 0.05108 to 0.09799   | Yes | **** | <0.0001 |
| 3757 | 0.06654 | 0.04309 to 0.09000   | Yes | **** | <0.0001 |
| 3758 | 0.0933  | 0.06985 to 0.1168    | Yes | **** | <0.0001 |
| 3759 | 0.063   | 0.03954 to 0.08645   | Yes | **** | <0.0001 |
| 3766 | 0.02619 | 0.002738 to 0.04964  | Yes | **   | 0.0027  |
| 3771 | 0.0241  | 0.0006514 to 0.04756 | Yes | *    | 0.0258  |
| 3772 | 0.04591 | 0.02245 to 0.06936   | Yes | **** | <0.0001 |
| 3773 | 0.03633 | 0.01288 to 0.05978   | Yes | **** | <0.0001 |
| 3778 | 0.02446 | 0.001011 to 0.04792  | Yes | *    | 0.0178  |
| 3779 | 0.03672 | 0.01326 to 0.06017   | Yes | **** | <0.0001 |
| 3788 | 0.04063 | 0.01718 to 0.06409   | Yes | **** | <0.0001 |
| 3802 | 0.02847 | 0.005020 to 0.05193  | Yes | ***  | 0.0002  |

|      |         |                     |     |      |         |
|------|---------|---------------------|-----|------|---------|
| 3805 | 0.02724 | 0.003786 to 0.05069 | Yes | ***  | 0.0008  |
| 3807 | 0.05781 | 0.03436 to 0.08126  | Yes | **** | <0.0001 |
| 3808 | 0.03188 | 0.008424 to 0.05533 | Yes | **** | <0.0001 |
| 3809 | 0.04309 | 0.01964 to 0.06654  | Yes | **** | <0.0001 |
| 3810 | 0.05602 | 0.03256 to 0.07947  | Yes | **** | <0.0001 |
| 3811 | 0.03158 | 0.008128 to 0.05504 | Yes | **** | <0.0001 |
| 3812 | 0.1371  | 0.1137 to 0.1606    | Yes | **** | <0.0001 |
| 3813 | 0.03323 | 0.009773 to 0.05668 | Yes | **** | <0.0001 |
| 3814 | 0.06348 | 0.04003 to 0.08694  | Yes | **** | <0.0001 |
| 3831 | 0.06339 | 0.03994 to 0.08684  | Yes | **** | <0.0001 |
| 3833 | 0.06562 | 0.04217 to 0.08908  | Yes | **** | <0.0001 |
| 3834 | 0.03166 | 0.008207 to 0.05511 | Yes | **** | <0.0001 |
| 3867 | 0.04286 | 0.01940 to 0.06631  | Yes | **** | <0.0001 |
| 3868 | 0.06355 | 0.04010 to 0.08700  | Yes | **** | <0.0001 |
| 3869 | 0.02991 | 0.006460 to 0.05337 | Yes | **** | <0.0001 |
| 3891 | 0.04526 | 0.02181 to 0.06872  | Yes | **** | <0.0001 |
| 3941 | 0.0257  | 0.002250 to 0.04916 | Yes | **   | 0.0047  |
| 3948 | 0.02774 | 0.004284 to 0.05119 | Yes | ***  | 0.0004  |
| 3956 | 0.02686 | 0.003404 to 0.05031 | Yes | **   | 0.0013  |
| 3982 | 0.0306  | 0.007150 to 0.05406 | Yes | **** | <0.0001 |
| 4007 | 0.04836 | 0.02490 to 0.07181  | Yes | **** | <0.0001 |
| 4015 | 0.03373 | 0.01028 to 0.05719  | Yes | **** | <0.0001 |
| 4024 | 0.03204 | 0.008582 to 0.05549 | Yes | **** | <0.0001 |
| 4028 | 0.02969 | 0.006234 to 0.05314 | Yes | **** | <0.0001 |
| 4047 | 0.08183 | 0.05838 to 0.1053   | Yes | **** | <0.0001 |
| 4062 | 0.04824 | 0.02479 to 0.07169  | Yes | **** | <0.0001 |
| 4063 | 0.05072 | 0.02727 to 0.07417  | Yes | **** | <0.0001 |
| 4064 | 0.05395 | 0.03050 to 0.07741  | Yes | **** | <0.0001 |
| 4065 | 0.06828 | 0.04483 to 0.09173  | Yes | **** | <0.0001 |
| 4066 | 0.1711  | 0.1477 to 0.1946    | Yes | **** | <0.0001 |
| 4067 | 0.2197  | 0.1962 to 0.2431    | Yes | **** | <0.0001 |
| 4068 | 0.09316 | 0.06970 to 0.1166   | Yes | **** | <0.0001 |
| 4069 | 0.03053 | 0.007073 to 0.05398 | Yes | **** | <0.0001 |
| 4070 | 0.05357 | 0.03012 to 0.07703  | Yes | **** | <0.0001 |
| 4071 | 0.02888 | 0.005422 to 0.05233 | Yes | ***  | 0.0001  |
| 4075 | 0.1065  | 0.08300 to 0.1299   | Yes | **** | <0.0001 |
| 4080 | 0.056   | 0.03255 to 0.07945  | Yes | **** | <0.0001 |
| 4081 | 0.03691 | 0.01345 to 0.06036  | Yes | **** | <0.0001 |
| 4082 | 0.0259  | 0.002445 to 0.04935 | Yes | **   | 0.0038  |
| 4090 | 0.02846 | 0.005011 to 0.05192 | Yes | ***  | 0.0002  |
| 4091 | 0.02938 | 0.005929 to 0.05284 | Yes | **** | <0.0001 |
| 4092 | 0.07939 | 0.05593 to 0.1028   | Yes | **** | <0.0001 |
| 4093 | 0.08718 | 0.06373 to 0.1106   | Yes | **** | <0.0001 |
| 4094 | 0.06626 | 0.04281 to 0.08972  | Yes | **** | <0.0001 |
| 4095 | 0.07356 | 0.05010 to 0.09701  | Yes | **** | <0.0001 |

|      |         |                     |     |      |         |
|------|---------|---------------------|-----|------|---------|
| 4096 | 0.1143  | 0.09087 to 0.1378   | Yes | **** | <0.0001 |
| 4097 | 0.04678 | 0.02333 to 0.07024  | Yes | **** | <0.0001 |
| 4099 | 0.04296 | 0.01951 to 0.06642  | Yes | **** | <0.0001 |
| 4101 | 0.04037 | 0.01692 to 0.06383  | Yes | **** | <0.0001 |
| 4102 | 0.06457 | 0.04112 to 0.08803  | Yes | **** | <0.0001 |
| 4103 | 0.05483 | 0.03138 to 0.07829  | Yes | **** | <0.0001 |
| 4112 | 0.05566 | 0.03221 to 0.07912  | Yes | **** | <0.0001 |
| 4116 | 0.07755 | 0.05409 to 0.1010   | Yes | **** | <0.0001 |
| 4117 | 0.09642 | 0.07297 to 0.1199   | Yes | **** | <0.0001 |
| 4125 | 0.1063  | 0.08288 to 0.1298   | Yes | **** | <0.0001 |
| 4126 | 0.05613 | 0.03267 to 0.07958  | Yes | **** | <0.0001 |
| 4127 | 0.06222 | 0.03877 to 0.08567  | Yes | **** | <0.0001 |
| 4128 | 0.07244 | 0.04899 to 0.09589  | Yes | **** | <0.0001 |
| 4129 | 0.02716 | 0.003703 to 0.05061 | Yes | ***  | 0.0009  |
| 4137 | 0.02877 | 0.005320 to 0.05223 | Yes | ***  | 0.0001  |
| 4138 | 0.06561 | 0.04216 to 0.08906  | Yes | **** | <0.0001 |
| 4139 | 0.07663 | 0.05318 to 0.1001   | Yes | **** | <0.0001 |
| 4140 | 0.05042 | 0.02696 to 0.07387  | Yes | **** | <0.0001 |
| 4150 | 0.03672 | 0.01326 to 0.06017  | Yes | **** | <0.0001 |
| 4154 | 0.0313  | 0.007843 to 0.05475 | Yes | **** | <0.0001 |
| 4156 | 0.03881 | 0.01535 to 0.06226  | Yes | **** | <0.0001 |
| 4157 | 0.03338 | 0.009927 to 0.05683 | Yes | **** | <0.0001 |
| 4158 | 0.0247  | 0.001246 to 0.04815 | Yes | *    | 0.0139  |
| 4160 | 0.07611 | 0.05266 to 0.09956  | Yes | **** | <0.0001 |
| 4161 | 0.02665 | 0.003201 to 0.05011 | Yes | **   | 0.0016  |
| 4162 | 0.06354 | 0.04008 to 0.08699  | Yes | **** | <0.0001 |
| 4163 | 0.07874 | 0.05529 to 0.1022   | Yes | **** | <0.0001 |
| 4164 | 0.1253  | 0.1018 to 0.1487    | Yes | **** | <0.0001 |
| 4165 | 0.119   | 0.09557 to 0.1425   | Yes | **** | <0.0001 |
| 4166 | 0.1745  | 0.1511 to 0.1980    | Yes | **** | <0.0001 |
| 4167 | 0.1608  | 0.1373 to 0.1843    | Yes | **** | <0.0001 |
| 4168 | 0.2401  | 0.2166 to 0.2635    | Yes | **** | <0.0001 |
| 4169 | 0.08921 | 0.06575 to 0.1127   | Yes | **** | <0.0001 |
| 4170 | 0.06467 | 0.04122 to 0.08812  | Yes | **** | <0.0001 |
| 4178 | 0.04646 | 0.02300 to 0.06991  | Yes | **** | <0.0001 |
| 4184 | 0.1181  | 0.09461 to 0.1415   | Yes | **** | <0.0001 |
| 4185 | 0.02701 | 0.003555 to 0.05046 | Yes | **   | 0.0011  |
| 4186 | 0.05791 | 0.03445 to 0.08136  | Yes | **** | <0.0001 |
| 4190 | 0.02546 | 0.002009 to 0.04892 | Yes | **   | 0.0061  |
| 4192 | 0.03876 | 0.01530 to 0.06221  | Yes | **** | <0.0001 |
| 4194 | 0.02824 | 0.004786 to 0.05169 | Yes | ***  | 0.0002  |
| 4200 | 0.0357  | 0.01225 to 0.05916  | Yes | **** | <0.0001 |
| 4203 | 0.06511 | 0.04166 to 0.08856  | Yes | **** | <0.0001 |
| 4204 | 0.07776 | 0.05431 to 0.1012   | Yes | **** | <0.0001 |
| 4205 | 0.1017  | 0.07820 to 0.1251   | Yes | **** | <0.0001 |

|      |         |                      |     |      |         |
|------|---------|----------------------|-----|------|---------|
| 4206 | 0.06366 | 0.04021 to 0.08711   | Yes | **** | <0.0001 |
| 4207 | 0.06478 | 0.04132 to 0.08823   | Yes | **** | <0.0001 |
| 4208 | 0.02914 | 0.005683 to 0.05259  | Yes | **** | <0.0001 |
| 4210 | 0.05785 | 0.03440 to 0.08130   | Yes | **** | <0.0001 |
| 4219 | 0.04845 | 0.02500 to 0.07191   | Yes | **** | <0.0001 |
| 4220 | 0.04852 | 0.02507 to 0.07197   | Yes | **** | <0.0001 |
| 4221 | 0.1054  | 0.08191 to 0.1288    | Yes | **** | <0.0001 |
| 4222 | 0.1242  | 0.1008 to 0.1477     | Yes | **** | <0.0001 |
| 4223 | 0.05921 | 0.03575 to 0.08266   | Yes | **** | <0.0001 |
| 4224 | 0.06926 | 0.04580 to 0.09271   | Yes | **** | <0.0001 |
| 4225 | 0.04703 | 0.02358 to 0.07049   | Yes | **** | <0.0001 |
| 4226 | 0.0724  | 0.04895 to 0.09585   | Yes | **** | <0.0001 |
| 4227 | 0.02899 | 0.005541 to 0.05245  | Yes | **** | <0.0001 |
| 4236 | 0.05017 | 0.02671 to 0.07362   | Yes | **** | <0.0001 |
| 4237 | 0.1113  | 0.08784 to 0.1347    | Yes | **** | <0.0001 |
| 4240 | 0.0468  | 0.02335 to 0.07026   | Yes | **** | <0.0001 |
| 4241 | 0.03919 | 0.01574 to 0.06264   | Yes | **** | <0.0001 |
| 4242 | 0.03714 | 0.01369 to 0.06060   | Yes | **** | <0.0001 |
| 4315 | 0.03724 | 0.01379 to 0.06069   | Yes | **** | <0.0001 |
| 4324 | 0.02512 | 0.001670 to 0.04858  | Yes | **   | 0.0088  |
| 4336 | 0.02851 | 0.005052 to 0.05196  | Yes | ***  | 0.0002  |
| 4339 | 0.04512 | 0.02166 to 0.06857   | Yes | **** | <0.0001 |
| 4348 | 0.02834 | 0.004885 to 0.05179  | Yes | ***  | 0.0002  |
| 4393 | 0.05546 | 0.03200 to 0.07891   | Yes | **** | <0.0001 |
| 4397 | 0.02593 | 0.002478 to 0.04938  | Yes | **   | 0.0036  |
| 4409 | 0.04588 | 0.02243 to 0.06934   | Yes | **** | <0.0001 |
| 4423 | 0.02532 | 0.001865 to 0.04877  | Yes | **   | 0.0071  |
| 4425 | 0.0497  | 0.02625 to 0.07316   | Yes | **** | <0.0001 |
| 4477 | 0.06216 | 0.03871 to 0.08562   | Yes | **** | <0.0001 |
| 4502 | 0.03204 | 0.008589 to 0.05550  | Yes | **** | <0.0001 |
| 4504 | 0.02788 | 0.004428 to 0.05134  | Yes | ***  | 0.0004  |
| 4509 | 0.03762 | 0.01417 to 0.06108   | Yes | **** | <0.0001 |
| 4510 | 0.03728 | 0.01383 to 0.06073   | Yes | **** | <0.0001 |
| 4518 | 0.06955 | 0.04610 to 0.09300   | Yes | **** | <0.0001 |
| 4567 | 0.02767 | 0.004214 to 0.05112  | Yes | ***  | 0.0005  |
| 4591 | 0.03338 | 0.009928 to 0.05683  | Yes | **** | <0.0001 |
| 4606 | 0.02706 | 0.003609 to 0.05052  | Yes | ***  | 0.001   |
| 4630 | 0.02382 | 0.0003640 to 0.04727 | Yes | *    | 0.0347  |
| 4635 | 0.05354 | 0.03009 to 0.07699   | Yes | **** | <0.0001 |
| 4636 | 0.09976 | 0.07630 to 0.1232    | Yes | **** | <0.0001 |
| 4638 | 0.05291 | 0.02945 to 0.07636   | Yes | **** | <0.0001 |
| 4639 | 0.03476 | 0.01130 to 0.05821   | Yes | **** | <0.0001 |
| 4730 | 0.04598 | 0.02253 to 0.06943   | Yes | **** | <0.0001 |
| 4731 | 0.06067 | 0.03721 to 0.08412   | Yes | **** | <0.0001 |
| 4742 | 0.04645 | 0.02299 to 0.06990   | Yes | **** | <0.0001 |

|      |         |                      |     |      |         |
|------|---------|----------------------|-----|------|---------|
| 4743 | 0.07084 | 0.04739 to 0.09429   | Yes | **** | <0.0001 |
| 4782 | 0.02509 | 0.001639 to 0.04855  | Yes | **   | 0.0091  |
| 4783 | 0.06437 | 0.04092 to 0.08782   | Yes | **** | <0.0001 |
| 4785 | 0.0783  | 0.05485 to 0.1018    | Yes | **** | <0.0001 |
| 4786 | 0.07228 | 0.04882 to 0.09573   | Yes | **** | <0.0001 |
| 4787 | 0.07244 | 0.04898 to 0.09589   | Yes | **** | <0.0001 |
| 4788 | 0.1262  | 0.1027 to 0.1496     | Yes | **** | <0.0001 |
| 4789 | 0.05166 | 0.02820 to 0.07511   | Yes | **** | <0.0001 |
| 4790 | 0.07381 | 0.05036 to 0.09727   | Yes | **** | <0.0001 |
| 4791 | 0.07306 | 0.04961 to 0.09652   | Yes | **** | <0.0001 |
| 4792 | 0.02623 | 0.002775 to 0.04968  | Yes | **   | 0.0026  |
| 4795 | 0.07338 | 0.04993 to 0.09684   | Yes | **** | <0.0001 |
| 4803 | 0.02402 | 0.0005672 to 0.04747 | Yes | *    | 0.0282  |
| 4807 | 0.03042 | 0.006965 to 0.05387  | Yes | **** | <0.0001 |
| 4808 | 0.0456  | 0.02215 to 0.06905   | Yes | **** | <0.0001 |
| 4810 | 0.05993 | 0.03648 to 0.08339   | Yes | **** | <0.0001 |
| 4814 | 0.03367 | 0.01021 to 0.05712   | Yes | **** | <0.0001 |
| 4815 | 0.02746 | 0.004004 to 0.05091  | Yes | ***  | 0.0006  |
| 4819 | 0.07773 | 0.05428 to 0.1012    | Yes | **** | <0.0001 |
| 4820 | 0.05125 | 0.02779 to 0.07470   | Yes | **** | <0.0001 |
| 4822 | 0.0908  | 0.06734 to 0.1142    | Yes | **** | <0.0001 |
| 4823 | 0.06293 | 0.03947 to 0.08638   | Yes | **** | <0.0001 |
| 4824 | 0.02488 | 0.001423 to 0.04833  | Yes | *    | 0.0115  |
| 4827 | 0.02807 | 0.004614 to 0.05152  | Yes | ***  | 0.0003  |
| 4829 | 0.08658 | 0.06313 to 0.1100    | Yes | **** | <0.0001 |
| 4845 | 0.04735 | 0.02390 to 0.07080   | Yes | **** | <0.0001 |
| 4848 | 0.05558 | 0.03212 to 0.07903   | Yes | **** | <0.0001 |
| 4849 | 0.09305 | 0.06960 to 0.1165    | Yes | **** | <0.0001 |
| 4850 | 0.04903 | 0.02558 to 0.07249   | Yes | **** | <0.0001 |
| 4853 | 0.06623 | 0.04278 to 0.08969   | Yes | **** | <0.0001 |
| 4854 | 0.03612 | 0.01267 to 0.05958   | Yes | **** | <0.0001 |
| 4891 | 0.03025 | 0.006798 to 0.05370  | Yes | **** | <0.0001 |
| 4892 | 0.08631 | 0.06286 to 0.1098    | Yes | **** | <0.0001 |
| 4893 | 0.1035  | 0.08004 to 0.1269    | Yes | **** | <0.0001 |
| 4895 | 0.09847 | 0.07502 to 0.1219    | Yes | **** | <0.0001 |
| 4896 | 0.05941 | 0.03596 to 0.08287   | Yes | **** | <0.0001 |
| 4897 | 0.04343 | 0.01998 to 0.06688   | Yes | **** | <0.0001 |
| 4899 | 0.0344  | 0.01095 to 0.05786   | Yes | **** | <0.0001 |
| 4900 | 0.1351  | 0.1116 to 0.1585     | Yes | **** | <0.0001 |
| 4901 | 0.05776 | 0.03431 to 0.08121   | Yes | **** | <0.0001 |
| 4902 | 0.02471 | 0.001252 to 0.04816  | Yes | *    | 0.0138  |
| 4906 | 0.02558 | 0.002129 to 0.04904  | Yes | **   | 0.0053  |
| 4908 | 0.02383 | 0.0003778 to 0.04728 | Yes | *    | 0.0342  |
| 4910 | 0.028   | 0.004545 to 0.05145  | Yes | ***  | 0.0003  |
| 4923 | 0.03033 | 0.006878 to 0.05379  | Yes | **** | <0.0001 |



|      |         |                      |     |      |         |
|------|---------|----------------------|-----|------|---------|
| 4924 | 0.03224 | 0.008790 to 0.05570  | Yes | **** | <0.0001 |
| 4967 | 0.03322 | 0.009770 to 0.05668  | Yes | **** | <0.0001 |
| 4968 | 0.02836 | 0.004905 to 0.05181  | Yes | ***  | 0.0002  |
| 4970 | 0.03532 | 0.01187 to 0.05878   | Yes | **** | <0.0001 |
| 4971 | 0.03204 | 0.008582 to 0.05549  | Yes | **** | <0.0001 |
| 4973 | 0.02685 | 0.003396 to 0.05030  | Yes | **   | 0.0013  |
| 4978 | 0.02901 | 0.005559 to 0.05247  | Yes | **** | <0.0001 |
| 4984 | 0.05766 | 0.03421 to 0.08111   | Yes | **** | <0.0001 |
| 4985 | 0.09459 | 0.07113 to 0.1180    | Yes | **** | <0.0001 |
| 4999 | 0.07622 | 0.05277 to 0.09967   | Yes | **** | <0.0001 |
| 5004 | 0.0316  | 0.008144 to 0.05505  | Yes | **** | <0.0001 |
| 5021 | 0.02436 | 0.0009085 to 0.04782 | Yes | *    | 0.0198  |
| 5063 | 0.05035 | 0.02690 to 0.07381   | Yes | **** | <0.0001 |
| 5069 | 0.02679 | 0.003332 to 0.05024  | Yes | **   | 0.0014  |
| 5101 | 0.0696  | 0.04615 to 0.09306   | Yes | **** | <0.0001 |
| 5213 | 0.04983 | 0.02638 to 0.07328   | Yes | **** | <0.0001 |
| 5361 | 0.02749 | 0.004039 to 0.05095  | Yes | ***  | 0.0006  |
| 5521 | 0.1169  | 0.09345 to 0.1404    | Yes | **** | <0.0001 |
| 5524 | 0.04102 | 0.01756 to 0.06447   | Yes | **** | <0.0001 |
| 5590 | 0.04373 | 0.02027 to 0.06718   | Yes | **** | <0.0001 |
| 5596 | 0.04613 | 0.02268 to 0.06958   | Yes | **** | <0.0001 |
| 5601 | 0.06861 | 0.04516 to 0.09207   | Yes | **** | <0.0001 |
| 5603 | 0.02532 | 0.001871 to 0.04878  | Yes | **   | 0.0071  |
| 5605 | 0.06508 | 0.04163 to 0.08854   | Yes | **** | <0.0001 |
| 5608 | 0.02558 | 0.002127 to 0.04903  | Yes | **   | 0.0053  |
| 5625 | 0.03035 | 0.006898 to 0.05381  | Yes | **** | <0.0001 |
| 5645 | 0.04484 | 0.02139 to 0.06829   | Yes | **** | <0.0001 |
| 5659 | 0.03684 | 0.01338 to 0.06029   | Yes | **** | <0.0001 |
| 5666 | 0.08276 | 0.05931 to 0.1062    | Yes | **** | <0.0001 |
| 5668 | 0.0348  | 0.01135 to 0.05826   | Yes | **** | <0.0001 |
| 5669 | 0.04867 | 0.02521 to 0.07212   | Yes | **** | <0.0001 |
| 5681 | 0.02383 | 0.0003751 to 0.04728 | Yes | *    | 0.0343  |
| 5695 | 0.03155 | 0.008092 to 0.05500  | Yes | **** | <0.0001 |
| 5788 | 0.03781 | 0.01435 to 0.06126   | Yes | **** | <0.0001 |
| 5819 | 0.03124 | 0.007783 to 0.05469  | Yes | **** | <0.0001 |
| 5876 | 0.04139 | 0.01793 to 0.06484   | Yes | **** | <0.0001 |
| 5879 | 0.03292 | 0.009469 to 0.05638  | Yes | **** | <0.0001 |
| 5882 | 0.03224 | 0.008788 to 0.05569  | Yes | **** | <0.0001 |
| 5883 | 0.03593 | 0.01248 to 0.05939   | Yes | **** | <0.0001 |
| 5890 | 0.03621 | 0.01276 to 0.05966   | Yes | **** | <0.0001 |
| 5891 | 0.06301 | 0.03955 to 0.08646   | Yes | **** | <0.0001 |
| 5893 | 0.0284  | 0.004947 to 0.05185  | Yes | ***  | 0.0002  |
| 5909 | 0.03212 | 0.008663 to 0.05557  | Yes | **** | <0.0001 |
| 5936 | 0.02979 | 0.006341 to 0.05325  | Yes | **** | <0.0001 |
| 5951 | 0.02721 | 0.003754 to 0.05066  | Yes | ***  | 0.0008  |

|      |         |                      |     |      |         |
|------|---------|----------------------|-----|------|---------|
| 5988 | 0.04826 | 0.02480 to 0.07171   | Yes | **** | <0.0001 |
| 5990 | 0.0629  | 0.03945 to 0.08636   | Yes | **** | <0.0001 |
| 6012 | 0.02948 | 0.006025 to 0.05293  | Yes | **** | <0.0001 |
| 6024 | 0.02786 | 0.004404 to 0.05131  | Yes | ***  | 0.0004  |
| 6060 | 0.03258 | 0.009123 to 0.05603  | Yes | **** | <0.0001 |
| 6078 | 0.03794 | 0.01449 to 0.06139   | Yes | **** | <0.0001 |
| 6081 | 0.03937 | 0.01592 to 0.06282   | Yes | **** | <0.0001 |
| 6094 | 0.02414 | 0.0006868 to 0.04759 | Yes | *    | 0.0249  |
| 6104 | 0.06547 | 0.04201 to 0.08892   | Yes | **** | <0.0001 |
| 6114 | 0.04269 | 0.01923 to 0.06614   | Yes | **** | <0.0001 |
| 6155 | 0.0926  | 0.06914 to 0.1161    | Yes | **** | <0.0001 |
| 6182 | 0.02512 | 0.001664 to 0.04857  | Yes | **   | 0.0089  |
| 6184 | 0.05993 | 0.03648 to 0.08339   | Yes | **** | <0.0001 |
| 6185 | 0.04332 | 0.01987 to 0.06677   | Yes | **** | <0.0001 |
| 6213 | 0.02419 | 0.0007374 to 0.04764 | Yes | *    | 0.0236  |
| 6253 | 0.02481 | 0.001361 to 0.04827  | Yes | *    | 0.0123  |
| 6330 | 0.05356 | 0.03011 to 0.07701   | Yes | **** | <0.0001 |
| 6333 | 0.535   | 0.5115 to 0.5584     | Yes | **** | <0.0001 |
| 6356 | 0.1001  | 0.07666 to 0.1236    | Yes | **** | <0.0001 |
| 6365 | 0.02751 | 0.004061 to 0.05097  | Yes | ***  | 0.0006  |
| 6378 | 0.0266  | 0.003143 to 0.05005  | Yes | **   | 0.0017  |
| 6380 | 0.0379  | 0.01445 to 0.06136   | Yes | **** | <0.0001 |
| 6382 | 0.0388  | 0.01535 to 0.06226   | Yes | **** | <0.0001 |
| 6411 | 0.02672 | 0.003269 to 0.05018  | Yes | **   | 0.0015  |
| 6677 | 0.02514 | 0.001688 to 0.04859  | Yes | **   | 0.0086  |
| 6683 | 0.02752 | 0.004068 to 0.05098  | Yes | ***  | 0.0006  |
| 6684 | 0.06604 | 0.04258 to 0.08949   | Yes | **** | <0.0001 |
| 6685 | 0.1077  | 0.08427 to 0.1312    | Yes | **** | <0.0001 |
| 6686 | 0.05298 | 0.02953 to 0.07644   | Yes | **** | <0.0001 |
| 6688 | 0.08152 | 0.05806 to 0.1050    | Yes | **** | <0.0001 |
| 6690 | 0.02802 | 0.004567 to 0.05147  | Yes | ***  | 0.0003  |
| 6693 | 0.04323 | 0.01978 to 0.06668   | Yes | **** | <0.0001 |
| 6694 | 0.06782 | 0.04436 to 0.09127   | Yes | **** | <0.0001 |
| 6695 | 0.1453  | 0.1218 to 0.1687     | Yes | **** | <0.0001 |
| 6696 | 0.03003 | 0.006579 to 0.05349  | Yes | **** | <0.0001 |
| 6697 | 0.02877 | 0.005315 to 0.05222  | Yes | ***  | 0.0001  |
| 6698 | 0.06032 | 0.03686 to 0.08377   | Yes | **** | <0.0001 |
| 6699 | 0.03297 | 0.009520 to 0.05643  | Yes | **** | <0.0001 |
| 6701 | 0.03221 | 0.008757 to 0.05566  | Yes | **** | <0.0001 |
| 6770 | 0.03105 | 0.007592 to 0.05450  | Yes | **** | <0.0001 |
| 6781 | 0.03015 | 0.006698 to 0.05360  | Yes | **** | <0.0001 |
| 6802 | 0.04321 | 0.01976 to 0.06666   | Yes | **** | <0.0001 |
| 6804 | 0.05557 | 0.03212 to 0.07903   | Yes | **** | <0.0001 |
| 6805 | 0.07692 | 0.05347 to 0.1004    | Yes | **** | <0.0001 |
| 6806 | 0.06388 | 0.04043 to 0.08734   | Yes | **** | <0.0001 |

|      |         |                      |     |      |         |
|------|---------|----------------------|-----|------|---------|
| 6807 | 0.02599 | 0.002537 to 0.04944  | Yes | **   | 0.0034  |
| 6808 | 0.03508 | 0.01163 to 0.05853   | Yes | **** | <0.0001 |
| 6812 | 0.05124 | 0.02779 to 0.07469   | Yes | **** | <0.0001 |
| 6815 | 0.02388 | 0.0004254 to 0.04733 | Yes | *    | 0.0326  |
| 6816 | 0.0337  | 0.01025 to 0.05715   | Yes | **** | <0.0001 |
| 6824 | 0.0493  | 0.02585 to 0.07276   | Yes | **** | <0.0001 |
| 6825 | 0.09573 | 0.07227 to 0.1192    | Yes | **** | <0.0001 |
| 6828 | 0.05586 | 0.03241 to 0.07931   | Yes | **** | <0.0001 |
| 6830 | 0.02826 | 0.004805 to 0.05171  | Yes | ***  | 0.0002  |
| 6831 | 0.07094 | 0.04748 to 0.09439   | Yes | **** | <0.0001 |
| 6832 | 0.07947 | 0.05602 to 0.1029    | Yes | **** | <0.0001 |
| 6833 | 0.1154  | 0.09191 to 0.1388    | Yes | **** | <0.0001 |
| 6834 | 0.08159 | 0.05814 to 0.1050    | Yes | **** | <0.0001 |
| 6835 | 0.03972 | 0.01627 to 0.06317   | Yes | **** | <0.0001 |
| 6836 | 0.03971 | 0.01626 to 0.06317   | Yes | **** | <0.0001 |
| 6838 | 0.05801 | 0.03455 to 0.08146   | Yes | **** | <0.0001 |
| 6839 | 0.06163 | 0.03817 to 0.08508   | Yes | **** | <0.0001 |
| 6842 | 0.02909 | 0.005637 to 0.05254  | Yes | **** | <0.0001 |
| 6847 | 0.02909 | 0.005641 to 0.05255  | Yes | **** | <0.0001 |
| 6848 | 0.1737  | 0.1503 to 0.1972     | Yes | **** | <0.0001 |
| 6849 | 0.0999  | 0.07644 to 0.1234    | Yes | **** | <0.0001 |
| 6850 | 0.1041  | 0.08066 to 0.1276    | Yes | **** | <0.0001 |
| 6851 | 0.02448 | 0.001024 to 0.04793  | Yes | *    | 0.0175  |
| 6864 | 0.04383 | 0.02038 to 0.06728   | Yes | **** | <0.0001 |
| 6865 | 0.07016 | 0.04671 to 0.09361   | Yes | **** | <0.0001 |
| 6901 | 0.02666 | 0.003210 to 0.05012  | Yes | **   | 0.0016  |
| 6914 | 0.03811 | 0.01465 to 0.06156   | Yes | **** | <0.0001 |
| 6930 | 0.0301  | 0.006642 to 0.05355  | Yes | **** | <0.0001 |
| 6931 | 0.05461 | 0.03116 to 0.07807   | Yes | **** | <0.0001 |
| 6933 | 0.03208 | 0.008628 to 0.05553  | Yes | **** | <0.0001 |
| 6936 | 0.08639 | 0.06294 to 0.1098    | Yes | **** | <0.0001 |
| 6938 | 0.03332 | 0.009863 to 0.05677  | Yes | **** | <0.0001 |
| 6949 | 0.02755 | 0.004094 to 0.05100  | Yes | ***  | 0.0006  |
| 6952 | 0.04093 | 0.01748 to 0.06438   | Yes | **** | <0.0001 |
| 6953 | 0.0414  | 0.01794 to 0.06485   | Yes | **** | <0.0001 |
| 6955 | 0.04608 | 0.02263 to 0.06953   | Yes | **** | <0.0001 |
| 6957 | 0.0265  | 0.003043 to 0.04995  | Yes | **   | 0.0019  |
| 6959 | 0.04859 | 0.02513 to 0.07204   | Yes | **** | <0.0001 |
| 6963 | 0.02857 | 0.005116 to 0.05202  | Yes | ***  | 0.0002  |
| 6965 | 0.02717 | 0.003718 to 0.05063  | Yes | ***  | 0.0009  |
| 6966 | 0.04216 | 0.01870 to 0.06561   | Yes | **** | <0.0001 |
| 6985 | 0.04391 | 0.02046 to 0.06736   | Yes | **** | <0.0001 |
| 6986 | 0.07655 | 0.05310 to 0.1000    | Yes | **** | <0.0001 |
| 6987 | 0.059   | 0.03555 to 0.08246   | Yes | **** | <0.0001 |
| 6988 | 0.04744 | 0.02398 to 0.07089   | Yes | **** | <0.0001 |

|      |         |                       |     |      |         |
|------|---------|-----------------------|-----|------|---------|
| 6989 | 0.04277 | 0.01931 to 0.06622    | Yes | **** | <0.0001 |
| 6992 | 0.0235  | 4.969e-005 to 0.04696 | Yes | *    | 0.0476  |
| 7001 | 0.02759 | 0.004135 to 0.05104   | Yes | ***  | 0.0005  |
| 7005 | 0.02653 | 0.003077 to 0.04998   | Yes | **   | 0.0018  |
| 7019 | 0.033   | 0.009546 to 0.05645   | Yes | **** | <0.0001 |
| 7021 | 0.04319 | 0.01974 to 0.06664    | Yes | **** | <0.0001 |
| 7022 | 0.03282 | 0.009366 to 0.05627   | Yes | **** | <0.0001 |
| 7023 | 0.03288 | 0.009423 to 0.05633   | Yes | **** | <0.0001 |
| 7025 | 0.04991 | 0.02646 to 0.07336    | Yes | **** | <0.0001 |
| 7044 | 0.05545 | 0.03200 to 0.07891    | Yes | **** | <0.0001 |
| 7100 | 0.03504 | 0.01159 to 0.05850    | Yes | **** | <0.0001 |
| 7102 | 0.03249 | 0.009035 to 0.05594   | Yes | **** | <0.0001 |
| 7107 | 0.05424 | 0.03079 to 0.07769    | Yes | **** | <0.0001 |
| 7109 | 0.04367 | 0.02021 to 0.06712    | Yes | **** | <0.0001 |
| 7110 | 0.03454 | 0.01109 to 0.05799    | Yes | **** | <0.0001 |
| 7112 | 0.02541 | 0.001960 to 0.04887   | Yes | **   | 0.0064  |
| 7113 | 0.02451 | 0.001060 to 0.04797   | Yes | *    | 0.0169  |
| 7121 | 0.0494  | 0.02594 to 0.07285    | Yes | **** | <0.0001 |
| 7123 | 0.031   | 0.007549 to 0.05446   | Yes | **** | <0.0001 |
| 7125 | 0.04459 | 0.02113 to 0.06804    | Yes | **** | <0.0001 |
| 7126 | 0.03105 | 0.007594 to 0.05450   | Yes | **** | <0.0001 |
| 7128 | 0.03656 | 0.01310 to 0.06001    | Yes | **** | <0.0001 |
| 7130 | 0.07456 | 0.05111 to 0.09802    | Yes | **** | <0.0001 |
| 7149 | 0.04405 | 0.02060 to 0.06750    | Yes | **** | <0.0001 |
| 7151 | 0.03495 | 0.01150 to 0.05840    | Yes | **** | <0.0001 |
| 7166 | 0.03706 | 0.01361 to 0.06052    | Yes | **** | <0.0001 |
| 7284 | 0.06104 | 0.03759 to 0.08449    | Yes | **** | <0.0001 |
| 7286 | 0.1249  | 0.1014 to 0.1484      | Yes | **** | <0.0001 |
| 7288 | 0.03279 | 0.009342 to 0.05625   | Yes | **** | <0.0001 |
| 7289 | 0.03455 | 0.01110 to 0.05801    | Yes | **** | <0.0001 |
| 7306 | 0.0476  | 0.02415 to 0.07106    | Yes | **** | <0.0001 |
| 7307 | 0.03041 | 0.006960 to 0.05387   | Yes | **** | <0.0001 |
| 7315 | 0.02788 | 0.004428 to 0.05133   | Yes | ***  | 0.0004  |
| 7324 | 0.02632 | 0.002871 to 0.04978   | Yes | **   | 0.0023  |
| 7325 | 0.03938 | 0.01593 to 0.06283    | Yes | **** | <0.0001 |
| 7327 | 0.04414 | 0.02069 to 0.06759    | Yes | **** | <0.0001 |
| 7328 | 0.09489 | 0.07143 to 0.1183     | Yes | **** | <0.0001 |
| 7331 | 0.1115  | 0.08806 to 0.1350     | Yes | **** | <0.0001 |
| 7332 | 0.07341 | 0.04996 to 0.09686    | Yes | **** | <0.0001 |
| 7333 | 0.08758 | 0.06413 to 0.1110     | Yes | **** | <0.0001 |
| 7334 | 0.06808 | 0.04463 to 0.09154    | Yes | **** | <0.0001 |
| 7335 | 0.03395 | 0.01049 to 0.05740    | Yes | **** | <0.0001 |
| 7337 | 0.03239 | 0.008941 to 0.05585   | Yes | **** | <0.0001 |
| 7353 | 0.02924 | 0.005789 to 0.05270   | Yes | **** | <0.0001 |
| 7379 | 0.03736 | 0.01391 to 0.06081    | Yes | **** | <0.0001 |

|      |         |                     |     |      |         |
|------|---------|---------------------|-----|------|---------|
| 7381 | 0.02799 | 0.004535 to 0.05144 | Yes | ***  | 0.0003  |
| 7383 | 0.02532 | 0.001871 to 0.04878 | Yes | **   | 0.0071  |
| 7410 | 0.04355 | 0.02010 to 0.06700  | Yes | **** | <0.0001 |
| 7411 | 0.02835 | 0.004895 to 0.05180 | Yes | ***  | 0.0002  |
| 7414 | 0.05431 | 0.03086 to 0.07777  | Yes | **** | <0.0001 |
| 7416 | 0.2024  | 0.1789 to 0.2258    | Yes | **** | <0.0001 |
| 7445 | 0.03873 | 0.01528 to 0.06219  | Yes | **** | <0.0001 |
| 7553 | 0.03285 | 0.009401 to 0.05631 | Yes | **** | <0.0001 |
| 7584 | 0.04233 | 0.01887 to 0.06578  | Yes | **** | <0.0001 |
| 7585 | 0.05694 | 0.03349 to 0.08039  | Yes | **** | <0.0001 |
| 7586 | 0.06735 | 0.04390 to 0.09080  | Yes | **** | <0.0001 |
| 7587 | 0.0509  | 0.02744 to 0.07435  | Yes | **** | <0.0001 |
| 7607 | 0.0387  | 0.01525 to 0.06216  | Yes | **** | <0.0001 |
| 7622 | 0.04167 | 0.01821 to 0.06512  | Yes | **** | <0.0001 |
| 7625 | 0.05915 | 0.03570 to 0.08261  | Yes | **** | <0.0001 |
| 7645 | 0.04048 | 0.01702 to 0.06393  | Yes | **** | <0.0001 |
| 7651 | 0.02659 | 0.003136 to 0.05004 | Yes | **   | 0.0017  |
| 7674 | 0.02935 | 0.005894 to 0.05280 | Yes | **** | <0.0001 |
| 7675 | 0.04195 | 0.01850 to 0.06541  | Yes | **** | <0.0001 |
| 7677 | 0.03818 | 0.01473 to 0.06164  | Yes | **** | <0.0001 |
| 7680 | 0.02665 | 0.003196 to 0.05010 | Yes | **   | 0.0016  |
| 7699 | 0.05523 | 0.03177 to 0.07868  | Yes | **** | <0.0001 |
| 7712 | 0.06825 | 0.04479 to 0.09170  | Yes | **** | <0.0001 |
| 7723 | 0.03704 | 0.01358 to 0.06049  | Yes | **** | <0.0001 |
| 7868 | 0.04624 | 0.02279 to 0.06970  | Yes | **** | <0.0001 |
| 7889 | 0.0348  | 0.01135 to 0.05826  | Yes | **** | <0.0001 |
| 7896 | 0.02797 | 0.004513 to 0.05142 | Yes | ***  | 0.0003  |
| 7907 | 0.03768 | 0.01422 to 0.06113  | Yes | **** | <0.0001 |
| 7908 | 0.03373 | 0.01028 to 0.05718  | Yes | **** | <0.0001 |
| 7928 | 0.02893 | 0.005480 to 0.05239 | Yes | ***  | 0.0001  |
| 7950 | 0.0418  | 0.01835 to 0.06525  | Yes | **** | <0.0001 |
| 7958 | 0.06015 | 0.03670 to 0.08361  | Yes | **** | <0.0001 |
| 7965 | 0.02691 | 0.003461 to 0.05037 | Yes | **   | 0.0012  |
| 7981 | 0.03899 | 0.01553 to 0.06244  | Yes | **** | <0.0001 |
| 7985 | 0.03664 | 0.01318 to 0.06009  | Yes | **** | <0.0001 |
| 7987 | 0.08859 | 0.06514 to 0.1120   | Yes | **** | <0.0001 |
| 8007 | 0.04946 | 0.02601 to 0.07292  | Yes | **** | <0.0001 |
| 8009 | 0.06668 | 0.04323 to 0.09014  | Yes | **** | <0.0001 |
| 8010 | 0.08085 | 0.05739 to 0.1043   | Yes | **** | <0.0001 |
| 8011 | 0.02973 | 0.006273 to 0.05318 | Yes | **** | <0.0001 |
| 8028 | 0.07866 | 0.05520 to 0.1021   | Yes | **** | <0.0001 |
| 8049 | 0.02663 | 0.003177 to 0.05008 | Yes | **   | 0.0016  |
| 8070 | 0.02925 | 0.005799 to 0.05271 | Yes | **** | <0.0001 |
| 8131 | 0.03386 | 0.01041 to 0.05732  | Yes | **** | <0.0001 |
| 8155 | 0.03193 | 0.008479 to 0.05539 | Yes | **** | <0.0001 |

|       |         |                      |     |      |         |
|-------|---------|----------------------|-----|------|---------|
| 8159  | 0.05256 | 0.02911 to 0.07601   | Yes | **** | <0.0001 |
| 8197  | 0.06686 | 0.04340 to 0.09031   | Yes | **** | <0.0001 |
| 8310  | 0.02652 | 0.003071 to 0.04998  | Yes | **   | 0.0018  |
| 8369  | 0.02422 | 0.0007695 to 0.04768 | Yes | *    | 0.0229  |
| 8468  | 0.02671 | 0.003261 to 0.05017  | Yes | **   | 0.0015  |
| 8478  | 0.0322  | 0.008747 to 0.05565  | Yes | **** | <0.0001 |
| 8519  | 0.03153 | 0.008073 to 0.05498  | Yes | **** | <0.0001 |
| 8543  | 0.03331 | 0.009859 to 0.05677  | Yes | **** | <0.0001 |
| 8594  | 0.04156 | 0.01810 to 0.06501   | Yes | **** | <0.0001 |
| 8625  | 0.02427 | 0.0008146 to 0.04772 | Yes | *    | 0.0218  |
| 8628  | 0.04102 | 0.01756 to 0.06447   | Yes | **** | <0.0001 |
| 8792  | 0.02641 | 0.002953 to 0.04986  | Yes | **   | 0.0021  |
| 8864  | 0.0507  | 0.02725 to 0.07416   | Yes | **** | <0.0001 |
| 8890  | 0.0268  | 0.003343 to 0.05025  | Yes | **   | 0.0014  |
| 8924  | 0.06402 | 0.04057 to 0.08748   | Yes | **** | <0.0001 |
| 8925  | 0.03287 | 0.009420 to 0.05633  | Yes | **** | <0.0001 |
| 8929  | 0.03216 | 0.008702 to 0.05561  | Yes | **** | <0.0001 |
| 8938  | 0.02878 | 0.005329 to 0.05224  | Yes | ***  | 0.0001  |
| 8942  | 0.02429 | 0.0008391 to 0.04775 | Yes | *    | 0.0213  |
| 8945  | 0.08586 | 0.06240 to 0.1093    | Yes | **** | <0.0001 |
| 8948  | 0.05931 | 0.03586 to 0.08276   | Yes | **** | <0.0001 |
| 8973  | 0.03042 | 0.006966 to 0.05387  | Yes | **** | <0.0001 |
| 8975  | 0.02521 | 0.001753 to 0.04866  | Yes | **   | 0.008   |
| 8982  | 0.0252  | 0.001746 to 0.04865  | Yes | **   | 0.0081  |
| 9049  | 0.04862 | 0.02517 to 0.07207   | Yes | **** | <0.0001 |
| 9053  | 0.02507 | 0.001614 to 0.04852  | Yes | **   | 0.0093  |
| 9074  | 0.03263 | 0.009177 to 0.05608  | Yes | **** | <0.0001 |
| 9076  | 0.04939 | 0.02594 to 0.07285   | Yes | **** | <0.0001 |
| 9077  | 0.05805 | 0.03460 to 0.08151   | Yes | **** | <0.0001 |
| 9183  | 0.05425 | 0.03080 to 0.07770   | Yes | **** | <0.0001 |
| 9302  | 0.03487 | 0.01141 to 0.05832   | Yes | **** | <0.0001 |
| 9309  | 0.02652 | 0.003062 to 0.04997  | Yes | **   | 0.0019  |
| 9614  | 0.02434 | 0.0008889 to 0.04780 | Yes | *    | 0.0202  |
| 9622  | 0.0386  | 0.01514 to 0.06205   | Yes | **** | <0.0001 |
| 9992  | 0.02638 | 0.002925 to 0.04983  | Yes | **   | 0.0022  |
| 10060 | 0.03436 | 0.01091 to 0.05782   | Yes | **** | <0.0001 |
| 10495 | 0.03957 | 0.01611 to 0.06302   | Yes | **** | <0.0001 |
| 11791 | 0.04858 | 0.02513 to 0.07204   | Yes | **** | <0.0001 |
| 13604 | 0.034   | 0.01055 to 0.05745   | Yes | **** | <0.0001 |
| 14814 | 0.09126 | 0.06780 to 0.1147    | Yes | **** | <0.0001 |
| 16880 | 0.106   | 0.08259 to 0.1295    | Yes | **** | <0.0001 |
| 17764 | 0.0524  | 0.02894 to 0.07585   | Yes | **** | <0.0001 |
| 18927 | 0.03222 | 0.008764 to 0.05567  | Yes | **** | <0.0001 |
| 20131 | 0.04124 | 0.01779 to 0.06470   | Yes | **** | <0.0001 |
| 20628 | 0.03592 | 0.01247 to 0.05938   | Yes | **** | <0.0001 |

|       |         |                     |     |      |         |
|-------|---------|---------------------|-----|------|---------|
| 20924 | 0.09278 | 0.06933 to 0.1162   | Yes | **** | <0.0001 |
| 21294 | 0.058   | 0.03454 to 0.08145  | Yes | **** | <0.0001 |
| 21423 | 0.0596  | 0.03615 to 0.08305  | Yes | **** | <0.0001 |
| 21636 | 0.1197  | 0.09621 to 0.1431   | Yes | **** | <0.0001 |
| 21747 | 0.137   | 0.1136 to 0.1605    | Yes | **** | <0.0001 |
| 21751 | 0.7746  | 0.7511 to 0.7980    | Yes | **** | <0.0001 |
| 21867 | 0.05621 | 0.03276 to 0.07967  | Yes | **** | <0.0001 |
| 22480 | 0.2231  | 0.1996 to 0.2466    | Yes | **** | <0.0001 |
| 22517 | 0.07141 | 0.04796 to 0.09486  | Yes | **** | <0.0001 |
| 22584 | 0.1394  | 0.1160 to 0.1629    | Yes | **** | <0.0001 |
| 22683 | 0.04393 | 0.02048 to 0.06738  | Yes | **** | <0.0001 |
| 22688 | 0.09667 | 0.07322 to 0.1201   | Yes | **** | <0.0001 |
| 22695 | 0.04551 | 0.02206 to 0.06896  | Yes | **** | <0.0001 |
| 23156 | 0.0709  | 0.04745 to 0.09436  | Yes | **** | <0.0001 |
| 23381 | 0.1103  | 0.08680 to 0.1337   | Yes | **** | <0.0001 |
| 23387 | 0.07047 | 0.04702 to 0.09392  | Yes | **** | <0.0001 |
| 23918 | 0.1031  | 0.07960 to 0.1265   | Yes | **** | <0.0001 |
| 23922 | 0.2451  | 0.2216 to 0.2685    | Yes | **** | <0.0001 |
| 23929 | 0.3039  | 0.2805 to 0.3274    | Yes | **** | <0.0001 |
| 23959 | 0.04584 | 0.02239 to 0.06929  | Yes | **** | <0.0001 |
| 24426 | 0.05788 | 0.03443 to 0.08133  | Yes | **** | <0.0001 |
| 24903 | 0.04166 | 0.01821 to 0.06512  | Yes | **** | <0.0001 |
| 25794 | 0.05553 | 0.03208 to 0.07898  | Yes | **** | <0.0001 |
| 25803 | 0.03895 | 0.01549 to 0.06240  | Yes | **** | <0.0001 |
| 25887 | 0.09814 | 0.07468 to 0.1216   | Yes | **** | <0.0001 |
| 25941 | 0.08654 | 0.06308 to 0.1100   | Yes | **** | <0.0001 |
| 26355 | 0.02953 | 0.006080 to 0.05299 | Yes | **** | <0.0001 |
| 26360 | 0.04576 | 0.02230 to 0.06921  | Yes | **** | <0.0001 |
| 26438 | 0.06898 | 0.04553 to 0.09243  | Yes | **** | <0.0001 |
| 26461 | 0.04209 | 0.01864 to 0.06554  | Yes | **** | <0.0001 |
| 26578 | 0.1759  | 0.1524 to 0.1993    | Yes | **** | <0.0001 |
| 26630 | 0.02602 | 0.002563 to 0.04947 | Yes | **   | 0.0033  |
| 26719 | 0.02864 | 0.005183 to 0.05209 | Yes | ***  | 0.0002  |
| 26765 | 0.02843 | 0.004980 to 0.05189 | Yes | ***  | 0.0002  |
| 26923 | 0.06478 | 0.04133 to 0.08823  | Yes | **** | <0.0001 |
| 26956 | 0.2591  | 0.2356 to 0.2825    | Yes | **** | <0.0001 |
| 26969 | 0.02623 | 0.002781 to 0.04969 | Yes | **   | 0.0026  |
| 26970 | 0.1283  | 0.1049 to 0.1518    | Yes | **** | <0.0001 |
| 26972 | 0.03626 | 0.01280 to 0.05971  | Yes | **** | <0.0001 |
| 27023 | 0.1626  | 0.1392 to 0.1861    | Yes | **** | <0.0001 |
| 27062 | 0.06318 | 0.03973 to 0.08663  | Yes | **** | <0.0001 |
| 27105 | 0.3056  | 0.2822 to 0.3291    | Yes | **** | <0.0001 |
| 27221 | 0.04227 | 0.01882 to 0.06572  | Yes | **** | <0.0001 |
| 27291 | 0.02724 | 0.003787 to 0.05069 | Yes | ***  | 0.0008  |
| 27314 | 0.1754  | 0.1519 to 0.1988    | Yes | **** | <0.0001 |

|       |          |                       |     |      |         |
|-------|----------|-----------------------|-----|------|---------|
| 27355 | 0.03551  | 0.01206 to 0.05896    | Yes | **** | <0.0001 |
| 27414 | 0.02671  | 0.003257 to 0.05016   | Yes | **   | 0.0015  |
| 27470 | 0.07867  | 0.05522 to 0.1021     | Yes | **** | <0.0001 |
| 27494 | 0.04061  | 0.01716 to 0.06407    | Yes | **** | <0.0001 |
| 27566 | 0.1104   | 0.08691 to 0.1338     | Yes | **** | <0.0001 |
| 27932 | 0.05603  | 0.03257 to 0.07948    | Yes | **** | <0.0001 |
| 27935 | 0.2755   | 0.2520 to 0.2989      | Yes | **** | <0.0001 |
| 27942 | 0.04769  | 0.02424 to 0.07114    | Yes | **** | <0.0001 |
| 27943 | 0.0354   | 0.01194 to 0.05885    | Yes | **** | <0.0001 |
| 28255 | 0.03524  | 0.01179 to 0.05870    | Yes | **** | <0.0001 |
| 28313 | 0.2027   | 0.1792 to 0.2261      | Yes | **** | <0.0001 |
| 28318 | 0.2737   | 0.2502 to 0.2971      | Yes | **** | <0.0001 |
| 28324 | 0.04423  | 0.02078 to 0.06768    | Yes | **** | <0.0001 |
| 28325 | 0.07814  | 0.05469 to 0.1016     | Yes | **** | <0.0001 |
| 28327 | 0.03028  | 0.006828 to 0.05373   | Yes | **** | <0.0001 |
| 28332 | 0.05654  | 0.03309 to 0.07999    | Yes | **** | <0.0001 |
| 28815 | 0.09059  | 0.06714 to 0.1140     | Yes | **** | <0.0001 |
| 28845 | 0.107    | 0.08355 to 0.1305     | Yes | **** | <0.0001 |
| 28953 | 0.08758  | 0.06413 to 0.1110     | Yes | **** | <0.0001 |
| 28958 | 0.4892   | 0.4657 to 0.5126      | Yes | **** | <0.0001 |
| 28960 | 0.1477   | 0.1242 to 0.1711      | Yes | **** | <0.0001 |
| 29268 | 0.1524   | 0.1290 to 0.1759      | Yes | **** | <0.0001 |
| 29331 | -0.02781 | -0.05127 to -0.004358 | Yes | ***  | 0.0004  |
| 29347 | 0.1529   | 0.1294 to 0.1763      | Yes | **** | <0.0001 |
| 29650 | 0.3139   | 0.2905 to 0.3374      | Yes | **** | <0.0001 |
| 29655 | 0.2434   | 0.2199 to 0.2668      | Yes | **** | <0.0001 |
| 29665 | 0.02369  | 0.0002318 to 0.04714  | Yes | *    | 0.0396  |
| 29666 | 0.03415  | 0.01069 to 0.05760    | Yes | **** | <0.0001 |
| 29667 | 0.02832  | 0.004868 to 0.05177   | Yes | ***  | 0.0002  |
| 29692 | 0.04903  | 0.02557 to 0.07248    | Yes | **** | <0.0001 |
| 29717 | 0.02516  | 0.001709 to 0.04862   | Yes | **   | 0.0084  |
| 29802 | 0.02347  | 1.653e-005 to 0.04692 | Yes | *    | 0.0492  |
| 29813 | 0.02592  | 0.002469 to 0.04938   | Yes | **   | 0.0037  |
| 29825 | 0.02391  | 0.0004591 to 0.04737  | Yes | *    | 0.0315  |
| 29969 | 0.02803  | 0.004577 to 0.05148   | Yes | ***  | 0.0003  |
| 29987 | 0.02668  | 0.003225 to 0.05013   | Yes | **   | 0.0016  |
| 30029 | 0.02734  | 0.003887 to 0.05079   | Yes | ***  | 0.0007  |
| 30088 | 0.04734  | 0.02389 to 0.07080    | Yes | **** | <0.0001 |
| 30089 | 0.06937  | 0.04592 to 0.09282    | Yes | **** | <0.0001 |
| 30090 | 0.02409  | 0.0006374 to 0.04754  | Yes | *    | 0.0262  |
| 30091 | 0.0268   | 0.003343 to 0.05025   | Yes | **   | 0.0014  |
| 30104 | 0.02817  | 0.004714 to 0.05162   | Yes | ***  | 0.0003  |
| 30192 | 0.027    | 0.003543 to 0.05045   | Yes | **   | 0.0011  |
| 30217 | 0.02362  | 0.0001711 to 0.04708  | Yes | *    | 0.0421  |
| 30237 | 0.02467  | 0.001217 to 0.04812   | Yes | *    | 0.0143  |



|       |         |                       |     |      |         |
|-------|---------|-----------------------|-----|------|---------|
| 30308 | 0.02773 | 0.004278 to 0.05118   | Yes | ***  | 0.0005  |
| 30316 | 0.02589 | 0.002441 to 0.04935   | Yes | **   | 0.0038  |
| 30323 | 0.02991 | 0.006453 to 0.05336   | Yes | **** | <0.0001 |
| 30330 | 0.02711 | 0.003658 to 0.05057   | Yes | ***  | 0.0009  |
| 30336 | 0.02577 | 0.002318 to 0.04922   | Yes | **   | 0.0043  |
| 30337 | 0.02651 | 0.003054 to 0.04996   | Yes | **   | 0.0019  |
| 30366 | 0.02476 | 0.001311 to 0.04822   | Yes | *    | 0.0129  |
| 30367 | 0.02726 | 0.003805 to 0.05071   | Yes | ***  | 0.0008  |
| 30374 | 0.02427 | 0.0008137 to 0.04772  | Yes | *    | 0.0218  |
| 30433 | 0.02452 | 0.001070 to 0.04798   | Yes | *    | 0.0167  |
| 30435 | 0.02936 | 0.005906 to 0.05281   | Yes | **** | <0.0001 |
| 30452 | 0.0282  | 0.004747 to 0.05165   | Yes | ***  | 0.0003  |
| 30454 | 0.02507 | 0.001612 to 0.04852   | Yes | **   | 0.0094  |
| 30461 | 0.03073 | 0.007275 to 0.05418   | Yes | **** | <0.0001 |
| 30463 | 0.0516  | 0.02815 to 0.07505    | Yes | **** | <0.0001 |
| 30464 | 0.03296 | 0.009507 to 0.05641   | Yes | **** | <0.0001 |
| 30465 | 0.03202 | 0.008566 to 0.05547   | Yes | **** | <0.0001 |
| 30466 | 0.02673 | 0.003277 to 0.05018   | Yes | **   | 0.0015  |
| 30469 | 0.029   | 0.005545 to 0.05245   | Yes | **** | <0.0001 |
| 30489 | 0.02606 | 0.002606 to 0.04951   | Yes | **   | 0.0031  |
| 30498 | 0.04026 | 0.01680 to 0.06371    | Yes | **** | <0.0001 |
| 30523 | 0.04045 | 0.01700 to 0.06390    | Yes | **** | <0.0001 |
| 30529 | 0.03567 | 0.01222 to 0.05912    | Yes | **** | <0.0001 |
| 30530 | 0.04178 | 0.01833 to 0.06524    | Yes | **** | <0.0001 |
| 30550 | 0.02721 | 0.003759 to 0.05067   | Yes | ***  | 0.0008  |
| 30551 | 0.03386 | 0.01040 to 0.05731    | Yes | **** | <0.0001 |
| 30554 | 0.0421  | 0.01864 to 0.06555    | Yes | **** | <0.0001 |
| 30567 | 0.05014 | 0.02668 to 0.07359    | Yes | **** | <0.0001 |
| 30569 | 0.02404 | 0.0005851 to 0.04749  | Yes | *    | 0.0277  |
| 30609 | 0.0243  | 0.0008498 to 0.04776  | Yes | *    | 0.021   |
| 30656 | 0.03874 | 0.01529 to 0.06220    | Yes | **** | <0.0001 |
| 30663 | 0.02875 | 0.005298 to 0.05220   | Yes | ***  | 0.0001  |
| 30672 | 0.02497 | 0.001512 to 0.04842   | Yes | *    | 0.0104  |
| 30681 | 0.02737 | 0.003915 to 0.05082   | Yes | ***  | 0.0007  |
| 30687 | 0.0247  | 0.001248 to 0.04815   | Yes | *    | 0.0138  |
| 30693 | 0.02413 | 0.0006797 to 0.04759  | Yes | *    | 0.0251  |
| 30759 | 0.02942 | 0.005963 to 0.05287   | Yes | **** | <0.0001 |
| 30760 | 0.02507 | 0.001614 to 0.04852   | Yes | **   | 0.0093  |
| 30776 | 0.02407 | 0.0006199 to 0.04753  | Yes | *    | 0.0267  |
| 30784 | 0.07697 | 0.05351 to 0.1004     | Yes | **** | <0.0001 |
| 30786 | 0.03295 | 0.009497 to 0.05640   | Yes | **** | <0.0001 |
| 30787 | 0.0341  | 0.01064 to 0.05755    | Yes | **** | <0.0001 |
| 30822 | 0.02388 | 0.0004300 to 0.04734  | Yes | *    | 0.0324  |
| 30823 | 0.02981 | 0.006356 to 0.05326   | Yes | **** | <0.0001 |
| 30878 | 0.02348 | 2.264e-005 to 0.04693 | Yes | *    | 0.0489  |

30924

0.02977

0.006313 to 0.05322

Yes

\*\*\*\*

<0.0001

---

Genetic Region

5' UTR

TRS-L

5' UTR

nsp1

nsp2

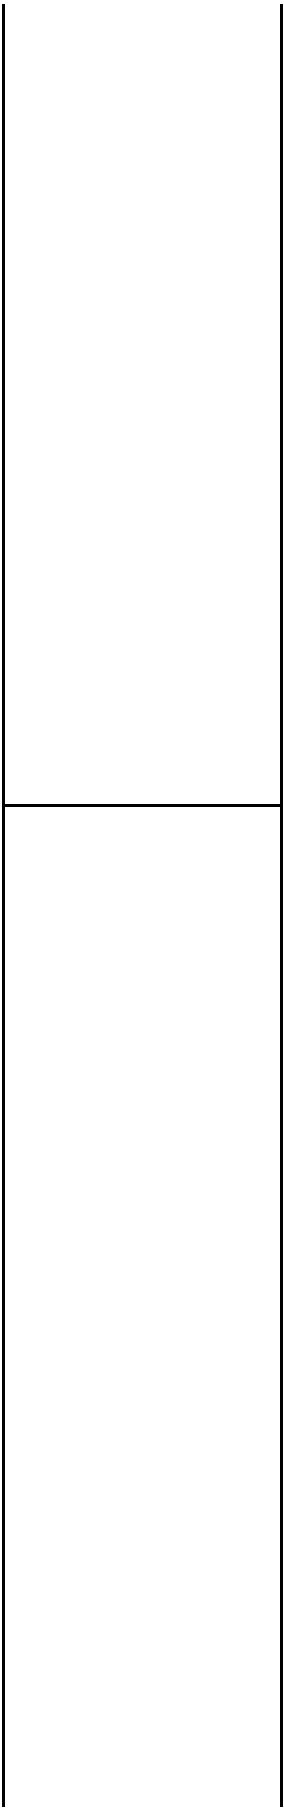

Vertical line on the left side of the page.

Vertical line on the left side of the page.

Vertical line on the left side of the page.

Vertical line on the left side of the page.

Vertical line on the left side of the page.

Vertical line on the left side of the page.



Vertical line on the left side of the page.

Vertical line on the left side of the page.

Vertical line on the left side of the page.

Vertical line on the left side of the page.

nsp3

Vertical line on the left side of the page.

Vertical line on the left side of the page.

Vertical line on the left side of the page.

Vertical line on the left side of the page.

Vertical line on the left side of the page.

Vertical line on the left side of the page.

Vertical line on the left side of the page.

Vertical line on the left side of the page.

|       |
|-------|
|       |
| nsp4  |
| nsp5  |
| nsp6  |
| nsp12 |
| nsp13 |
| nsp14 |
| nsp15 |



nsp16

TRS-2

gene 2

HE protein

TRS-3

S protein

|                     |
|---------------------|
|                     |
| TRS-4               |
| untranslated region |
| Gene 4              |
| TRS-5               |
| E protein           |
| TRS-6               |
| M protein           |
| TRS-7               |
|                     |

N protein

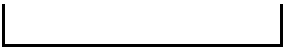

| Position | Mean Diff. | 95.00% CI of diff.     | Significant? | Summary | Adjusted P Value | Gene  |
|----------|------------|------------------------|--------------|---------|------------------|-------|
| 64       | 0.06062    | 0.03947 to 0.08177     | Yes          | ****    | <0.0001          | TRS-L |
| 66       | 0.5902     | 0.5690 to 0.6113       | Yes          | ****    | <0.0001          |       |
| 67       | 0.06445    | 0.04330 to 0.08561     | Yes          | ****    | <0.0001          |       |
| 68       | 0.08157    | 0.06042 to 0.1027      | Yes          | ****    | <0.0001          |       |
| 69       | 0.4869     | 0.4658 to 0.5081       | Yes          | ****    | <0.0001          |       |
| 70       | 0.02203    | 0.0008775 to 0.04318   | Yes          | *       | 0.0185           |       |
| 71       | 0.5224     | 0.5013 to 0.5436       | Yes          | ****    | <0.0001          |       |
| 75       | 0.2152     | 0.1940 to 0.2363       | Yes          | ****    | <0.0001          |       |
| 1583     | 0.02121    | 6.071e-005 to 0.04236  | Yes          | *       | 0.0468           | nsp2  |
| 1626     | 0.03041    | 0.009262 to 0.05156    | Yes          | ****    | <0.0001          |       |
| 2173     | 0.03052    | 0.009367 to 0.05167    | Yes          | ****    | <0.0001          |       |
| 2540     | 0.02439    | 0.003236 to 0.04554    | Yes          | **      | 0.001            |       |
| 2881     | 0.02337    | 0.002223 to 0.04452    | Yes          | **      | 0.0037           |       |
| 3812     | 0.02374    | 0.002587 to 0.04489    | Yes          | **      | 0.0023           |       |
| 4066     | 0.02461    | 0.003461 to 0.04576    | Yes          | ***     | 0.0008           |       |
| 4094     | 0.02986    | 0.008713 to 0.05101    | Yes          | ****    | <0.0001          |       |
| 4111     | -0.02955   | -0.05070 to -0.008399  | Yes          | ****    | <0.0001          |       |
| 4164     | 0.02225    | 0.001094 to 0.04340    | Yes          | *       | 0.0143           |       |
| 4166     | 0.03324    | 0.01209 to 0.05440     | Yes          | ****    | <0.0001          |       |
| 4167     | 0.02459    | 0.003437 to 0.04574    | Yes          | ***     | 0.0008           |       |
| 4168     | 0.02929    | 0.008140 to 0.05044    | Yes          | ****    | <0.0001          |       |
| 4226     | 0.02518    | 0.004030 to 0.04633    | Yes          | ***     | 0.0004           |       |
| 4234     | -0.02829   | -0.04944 to -0.007139  | Yes          | ****    | <0.0001          |       |
| 4422     | -0.02244   | -0.04359 to -0.001289  | Yes          | *       | 0.0114           |       |
| 4618     | -0.05567   | -0.07682 to -0.03452   | Yes          | ****    | <0.0001          |       |
| 4731     | -0.03008   | -0.05123 to -0.008925  | Yes          | ****    | <0.0001          |       |
| 4810     | -0.04062   | -0.06177 to -0.01947   | Yes          | ****    | <0.0001          |       |
| 4813     | -0.04759   | -0.06874 to -0.02644   | Yes          | ****    | <0.0001          |       |
| 4817     | -0.02264   | -0.04379 to -0.001484  | Yes          | **      | 0.009            |       |
| 4820     | -0.04967   | -0.07082 to -0.02852   | Yes          | ****    | <0.0001          |       |
| 4880     | -0.02415   | -0.04531 to -0.003004  | Yes          | **      | 0.0014           |       |
| 4887     | -0.03327   | -0.05442 to -0.01212   | Yes          | ****    | <0.0001          |       |
| 4895     | -0.02815   | -0.04930 to -0.007001  | Yes          | ****    | <0.0001          |       |
| 4900     | -0.02458   | -0.04573 to -0.003426  | Yes          | ***     | 0.0008           |       |
| 5000     | -0.02146   | -0.04261 to -0.0003041 | Yes          | *       | 0.0356           |       |
| 5586     | -0.02391   | -0.04506 to -0.002755  | Yes          | **      | 0.0019           |       |
| 5590     | -0.03013   | -0.05128 to -0.008978  | Yes          | ****    | <0.0001          |       |
| 5594     | -0.03561   | -0.05676 to -0.01446   | Yes          | ****    | <0.0001          |       |
| 5595     | -0.0977    | -0.1189 to -0.07655    | Yes          | ****    | <0.0001          |       |
| 5598     | -0.1313    | -0.1525 to -0.1102     | Yes          | ****    | <0.0001          |       |
| 5601     | -0.06997   | -0.09112 to -0.04882   | Yes          | ****    | <0.0001          |       |
| 5666     | -0.02321   | -0.04436 to -0.002063  | Yes          | **      | 0.0045           |       |
| 5883     | -0.02617   | -0.04732 to -0.005020  | Yes          | ****    | <0.0001          |       |
| 5892     | -0.04057   | -0.06172 to -0.01941   | Yes          | ****    | <0.0001          |       |

|      |          |                        |     |      |         |
|------|----------|------------------------|-----|------|---------|
| 5893 | -0.02312 | -0.04427 to -0.001969  | Yes | **   | 0.005   |
| 5978 | -0.02288 | -0.04403 to -0.001729  | Yes | **   | 0.0067  |
| 5983 | -0.02867 | -0.04982 to -0.007521  | Yes | **** | <0.0001 |
| 5985 | -0.02594 | -0.04709 to -0.004787  | Yes | ***  | 0.0001  |
| 5987 | -0.0303  | -0.05145 to -0.009151  | Yes | **** | <0.0001 |
| 5988 | -0.06449 | -0.08564 to -0.04334   | Yes | **** | <0.0001 |
| 5995 | -0.03403 | -0.05518 to -0.01288   | Yes | **** | <0.0001 |
| 6012 | -0.02916 | -0.05031 to -0.008007  | Yes | **** | <0.0001 |
| 6013 | -0.04347 | -0.06462 to -0.02232   | Yes | **** | <0.0001 |
| 6078 | -0.02552 | -0.04667 to -0.004364  | Yes | ***  | 0.0002  |
| 6083 | -0.02632 | -0.04747 to -0.005164  | Yes | **** | <0.0001 |
| 6110 | -0.02262 | -0.04377 to -0.001470  | Yes | **   | 0.0092  |
| 6113 | -0.04095 | -0.06210 to -0.01979   | Yes | **** | <0.0001 |
| 6114 | -0.02438 | -0.04553 to -0.003232  | Yes | **   | 0.001   |
| 6115 | -0.02752 | -0.04867 to -0.006366  | Yes | **** | <0.0001 |
| 6140 | -0.02443 | -0.04558 to -0.003281  | Yes | ***  | 0.001   |
| 6184 | -0.0658  | -0.08695 to -0.04465   | Yes | **** | <0.0001 |
| 6298 | -0.02505 | -0.04620 to -0.003901  | Yes | ***  | 0.0004  |
| 6333 | 0.09839  | 0.07724 to 0.1195      | Yes | **** | <0.0001 |
| 6341 | -0.02705 | -0.04820 to -0.005897  | Yes | **** | <0.0001 |
| 6348 | -0.03842 | -0.05957 to -0.01727   | Yes | **** | <0.0001 |
| 6351 | -0.02328 | -0.04443 to -0.002131  | Yes | **   | 0.0041  |
| 6356 | -0.06155 | -0.08270 to -0.04040   | Yes | **** | <0.0001 |
| 6357 | -0.02469 | -0.04585 to -0.003543  | Yes | ***  | 0.0007  |
| 6368 | -0.02409 | -0.04524 to -0.002935  | Yes | **   | 0.0015  |
| 6371 | -0.02607 | -0.04722 to -0.004922  | Yes | ***  | 0.0001  |
| 6372 | -0.02883 | -0.04998 to -0.007680  | Yes | **** | <0.0001 |
| 6373 | -0.02195 | -0.04310 to -0.0007947 | Yes | *    | 0.0204  |
| 6374 | -0.05083 | -0.07198 to -0.02968   | Yes | **** | <0.0001 |
| 6375 | -0.02568 | -0.04683 to -0.004532  | Yes | ***  | 0.0002  |
| 6376 | -0.07353 | -0.09468 to -0.05238   | Yes | **** | <0.0001 |
| 6377 | -0.05124 | -0.07239 to -0.03009   | Yes | **** | <0.0001 |
| 6378 | -0.04719 | -0.06834 to -0.02604   | Yes | **** | <0.0001 |
| 6379 | -0.02129 | -0.04245 to -0.0001432 | Yes | *    | 0.0427  |
| 6380 | -0.03036 | -0.05151 to -0.009212  | Yes | **** | <0.0001 |
| 6382 | -0.05049 | -0.07165 to -0.02934   | Yes | **** | <0.0001 |
| 6384 | -0.05441 | -0.07556 to -0.03326   | Yes | **** | <0.0001 |
| 6412 | -0.03684 | -0.05799 to -0.01569   | Yes | **** | <0.0001 |
| 6596 | -0.03063 | -0.05178 to -0.009475  | Yes | **** | <0.0001 |
| 6597 | -0.05713 | -0.07828 to -0.03598   | Yes | **** | <0.0001 |
| 6598 | -0.05257 | -0.07372 to -0.03142   | Yes | **** | <0.0001 |
| 6603 | -0.0411  | -0.06225 to -0.01995   | Yes | **** | <0.0001 |
| 6605 | -0.0498  | -0.07095 to -0.02865   | Yes | **** | <0.0001 |
| 6606 | -0.02202 | -0.04317 to -0.0008641 | Yes | *    | 0.0188  |
| 6607 | -0.0415  | -0.06266 to -0.02035   | Yes | **** | <0.0001 |

|      |          |                       |     |      |         |
|------|----------|-----------------------|-----|------|---------|
| 6609 | -0.06446 | -0.08561 to -0.04331  | Yes | **** | <0.0001 |
| 6626 | -0.04197 | -0.06312 to -0.02081  | Yes | **** | <0.0001 |
| 6637 | -0.03217 | -0.05332 to -0.01102  | Yes | **** | <0.0001 |
| 6638 | -0.04158 | -0.06273 to -0.02043  | Yes | **** | <0.0001 |
| 6640 | -0.02442 | -0.04557 to -0.003271 | Yes | ***  | 0.001   |
| 6641 | -0.09451 | -0.1157 to -0.07336   | Yes | **** | <0.0001 |
| 6671 | -0.02747 | -0.04863 to -0.006324 | Yes | **** | <0.0001 |
| 6673 | -0.04796 | -0.06912 to -0.02681  | Yes | **** | <0.0001 |
| 6674 | -0.02449 | -0.04564 to -0.003342 | Yes | ***  | 0.0009  |
| 6675 | -0.0411  | -0.06225 to -0.01995  | Yes | **** | <0.0001 |
| 6676 | -0.07208 | -0.09323 to -0.05093  | Yes | **** | <0.0001 |
| 6677 | -0.0325  | -0.05366 to -0.01135  | Yes | **** | <0.0001 |
| 6681 | -0.04895 | -0.07010 to -0.02780  | Yes | **** | <0.0001 |
| 6682 | -0.03584 | -0.05699 to -0.01469  | Yes | **** | <0.0001 |
| 6683 | -0.02765 | -0.04881 to -0.006503 | Yes | **** | <0.0001 |
| 6684 | -0.08963 | -0.1108 to -0.06848   | Yes | **** | <0.0001 |
| 6685 | -0.04853 | -0.06968 to -0.02738  | Yes | **** | <0.0001 |
| 6686 | -0.08602 | -0.1072 to -0.06487   | Yes | **** | <0.0001 |
| 6687 | -0.05497 | -0.07612 to -0.03382  | Yes | **** | <0.0001 |
| 6688 | -0.06679 | -0.08794 to -0.04564  | Yes | **** | <0.0001 |
| 6689 | -0.05714 | -0.07830 to -0.03599  | Yes | **** | <0.0001 |
| 6690 | -0.06342 | -0.08457 to -0.04227  | Yes | **** | <0.0001 |
| 6691 | -0.07129 | -0.09244 to -0.05014  | Yes | **** | <0.0001 |
| 6692 | -0.06357 | -0.08472 to -0.04242  | Yes | **** | <0.0001 |
| 6693 | -0.02728 | -0.04843 to -0.006127 | Yes | **** | <0.0001 |
| 6694 | -0.05183 | -0.07298 to -0.03068  | Yes | **** | <0.0001 |
| 6695 | -0.08552 | -0.1067 to -0.06437   | Yes | **** | <0.0001 |
| 6696 | -0.05094 | -0.07209 to -0.02979  | Yes | **** | <0.0001 |
| 6697 | -0.02408 | -0.04523 to -0.002924 | Yes | **   | 0.0015  |
| 6698 | -0.0451  | -0.06625 to -0.02395  | Yes | **** | <0.0001 |
| 6699 | -0.06129 | -0.08244 to -0.04013  | Yes | **** | <0.0001 |
| 6700 | -0.05222 | -0.07337 to -0.03107  | Yes | **** | <0.0001 |
| 6701 | -0.05902 | -0.08017 to -0.03786  | Yes | **** | <0.0001 |
| 6702 | -0.0226  | -0.04375 to -0.001452 | Yes | **   | 0.0094  |
| 6724 | -0.03499 | -0.05614 to -0.01384  | Yes | **** | <0.0001 |
| 6725 | -0.02669 | -0.04784 to -0.005538 | Yes | **** | <0.0001 |
| 6739 | -0.02309 | -0.04424 to -0.001936 | Yes | **   | 0.0052  |
| 6740 | -0.03749 | -0.05864 to -0.01634  | Yes | **** | <0.0001 |
| 6741 | -0.0246  | -0.04575 to -0.003444 | Yes | ***  | 0.0008  |
| 6742 | -0.0258  | -0.04695 to -0.004653 | Yes | ***  | 0.0002  |
| 6760 | -0.02411 | -0.04526 to -0.002955 | Yes | **   | 0.0015  |
| 6767 | -0.04006 | -0.06121 to -0.01891  | Yes | **** | <0.0001 |
| 6768 | -0.0357  | -0.05685 to -0.01455  | Yes | **** | <0.0001 |
| 6784 | -0.04234 | -0.06349 to -0.02119  | Yes | **** | <0.0001 |
| 6785 | -0.0323  | -0.05345 to -0.01114  | Yes | **** | <0.0001 |

|      |          |                        |     |      |         |
|------|----------|------------------------|-----|------|---------|
| 6786 | -0.02547 | -0.04662 to -0.004318  | Yes | ***  | 0.0002  |
| 6787 | -0.02947 | -0.05062 to -0.008315  | Yes | **** | <0.0001 |
| 6788 | -0.05459 | -0.07574 to -0.03344   | Yes | **** | <0.0001 |
| 6796 | -0.03202 | -0.05317 to -0.01086   | Yes | **** | <0.0001 |
| 6797 | -0.02336 | -0.04451 to -0.002213  | Yes | **   | 0.0037  |
| 6798 | -0.02334 | -0.04449 to -0.002184  | Yes | **   | 0.0038  |
| 6799 | -0.0395  | -0.06065 to -0.01835   | Yes | **** | <0.0001 |
| 6800 | -0.03312 | -0.05428 to -0.01197   | Yes | **** | <0.0001 |
| 6801 | -0.02859 | -0.04974 to -0.007440  | Yes | **** | <0.0001 |
| 6802 | -0.03291 | -0.05406 to -0.01176   | Yes | **** | <0.0001 |
| 6803 | -0.02833 | -0.04948 to -0.007174  | Yes | **** | <0.0001 |
| 6804 | -0.0598  | -0.08095 to -0.03865   | Yes | **** | <0.0001 |
| 6805 | -0.05188 | -0.07303 to -0.03073   | Yes | **** | <0.0001 |
| 6806 | -0.04961 | -0.07076 to -0.02846   | Yes | **** | <0.0001 |
| 6807 | -0.06742 | -0.08858 to -0.04627   | Yes | **** | <0.0001 |
| 6808 | -0.04493 | -0.06608 to -0.02378   | Yes | **** | <0.0001 |
| 6809 | -0.02729 | -0.04844 to -0.006136  | Yes | **** | <0.0001 |
| 6810 | -0.04106 | -0.06221 to -0.01991   | Yes | **** | <0.0001 |
| 6824 | -0.04907 | -0.07022 to -0.02792   | Yes | **** | <0.0001 |
| 6825 | -0.05233 | -0.07348 to -0.03117   | Yes | **** | <0.0001 |
| 6826 | -0.0613  | -0.08245 to -0.04015   | Yes | **** | <0.0001 |
| 6827 | -0.05667 | -0.07782 to -0.03552   | Yes | **** | <0.0001 |
| 6828 | -0.08214 | -0.1033 to -0.06099    | Yes | **** | <0.0001 |
| 6829 | -0.05204 | -0.07319 to -0.03089   | Yes | **** | <0.0001 |
| 6830 | -0.07963 | -0.1008 to -0.05848    | Yes | **** | <0.0001 |
| 6831 | -0.09369 | -0.1148 to -0.07254    | Yes | **** | <0.0001 |
| 6832 | -0.1054  | -0.1265 to -0.08423    | Yes | **** | <0.0001 |
| 6833 | -0.06875 | -0.08990 to -0.04760   | Yes | **** | <0.0001 |
| 6834 | -0.02613 | -0.04728 to -0.004977  | Yes | **** | <0.0001 |
| 6835 | -0.06345 | -0.08460 to -0.04230   | Yes | **** | <0.0001 |
| 6838 | -0.04493 | -0.06608 to -0.02378   | Yes | **** | <0.0001 |
| 6839 | -0.07738 | -0.09854 to -0.05623   | Yes | **** | <0.0001 |
| 6841 | -0.02967 | -0.05082 to -0.008522  | Yes | **** | <0.0001 |
| 6847 | -0.0297  | -0.05085 to -0.008550  | Yes | **** | <0.0001 |
| 6848 | -0.08976 | -0.1109 to -0.06861    | Yes | **** | <0.0001 |
| 6849 | -0.07937 | -0.1005 to -0.05822    | Yes | **** | <0.0001 |
| 6850 | -0.0624  | -0.08355 to -0.04124   | Yes | **** | <0.0001 |
| 6851 | -0.02758 | -0.04873 to -0.006433  | Yes | **** | <0.0001 |
| 6852 | -0.02489 | -0.04604 to -0.003742  | Yes | ***  | 0.0005  |
| 6862 | -0.0256  | -0.04675 to -0.004450  | Yes | ***  | 0.0002  |
| 6922 | -0.03206 | -0.05321 to -0.01091   | Yes | **** | <0.0001 |
| 6928 | -0.02139 | -0.04254 to -0.0002427 | Yes | *    | 0.0382  |
| 6930 | -0.05013 | -0.07128 to -0.02898   | Yes | **** | <0.0001 |
| 6931 | -0.04386 | -0.06502 to -0.02271   | Yes | **** | <0.0001 |
| 6932 | -0.06572 | -0.08687 to -0.04457   | Yes | **** | <0.0001 |



|      |          |                        |     |      |         |
|------|----------|------------------------|-----|------|---------|
| 6933 | -0.03751 | -0.05866 to -0.01636   | Yes | **** | <0.0001 |
| 6934 | -0.02242 | -0.04357 to -0.001271  | Yes | *    | 0.0116  |
| 6936 | -0.0269  | -0.04805 to -0.005745  | Yes | **** | <0.0001 |
| 6941 | -0.02749 | -0.04864 to -0.006338  | Yes | **** | <0.0001 |
| 6951 | -0.03112 | -0.05227 to -0.009966  | Yes | **** | <0.0001 |
| 6952 | -0.06974 | -0.09089 to -0.04858   | Yes | **** | <0.0001 |
| 6953 | -0.03647 | -0.05762 to -0.01532   | Yes | **** | <0.0001 |
| 6954 | -0.03952 | -0.06067 to -0.01837   | Yes | **** | <0.0001 |
| 6955 | -0.07575 | -0.09691 to -0.05460   | Yes | **** | <0.0001 |
| 6956 | -0.08744 | -0.1086 to -0.06629    | Yes | **** | <0.0001 |
| 6958 | -0.02503 | -0.04618 to -0.003881  | Yes | ***  | 0.0004  |
| 6959 | -0.0341  | -0.05525 to -0.01295   | Yes | **** | <0.0001 |
| 6964 | -0.05381 | -0.07496 to -0.03266   | Yes | **** | <0.0001 |
| 6965 | -0.04446 | -0.06561 to -0.02331   | Yes | **** | <0.0001 |
| 6966 | -0.03532 | -0.05647 to -0.01417   | Yes | **** | <0.0001 |
| 6983 | -0.02942 | -0.05057 to -0.008271  | Yes | **** | <0.0001 |
| 6984 | -0.02402 | -0.04517 to -0.002873  | Yes | **   | 0.0016  |
| 6986 | -0.04639 | -0.06755 to -0.02524   | Yes | **** | <0.0001 |
| 6987 | -0.02781 | -0.04896 to -0.006662  | Yes | **** | <0.0001 |
| 6988 | -0.02955 | -0.05070 to -0.008400  | Yes | **** | <0.0001 |
| 7005 | -0.02453 | -0.04568 to -0.003379  | Yes | ***  | 0.0008  |
| 7106 | -0.03128 | -0.05244 to -0.01013   | Yes | **** | <0.0001 |
| 7107 | -0.05062 | -0.07177 to -0.02947   | Yes | **** | <0.0001 |
| 7108 | -0.02168 | -0.04284 to -0.0005332 | Yes | *    | 0.0275  |
| 7109 | -0.04051 | -0.06166 to -0.01936   | Yes | **** | <0.0001 |
| 7110 | -0.04984 | -0.07099 to -0.02869   | Yes | **** | <0.0001 |
| 7111 | -0.03083 | -0.05198 to -0.009677  | Yes | **** | <0.0001 |
| 7117 | -0.03765 | -0.05880 to -0.01650   | Yes | **** | <0.0001 |
| 7118 | -0.03993 | -0.06108 to -0.01878   | Yes | **** | <0.0001 |
| 7120 | -0.142   | -0.1631 to -0.1208     | Yes | **** | <0.0001 |
| 7121 | -0.04954 | -0.07069 to -0.02839   | Yes | **** | <0.0001 |
| 7123 | -0.0493  | -0.07046 to -0.02815   | Yes | **** | <0.0001 |
| 7124 | -0.04942 | -0.07057 to -0.02826   | Yes | **** | <0.0001 |
| 7125 | -0.04597 | -0.06712 to -0.02482   | Yes | **** | <0.0001 |
| 7126 | -0.0631  | -0.08425 to -0.04195   | Yes | **** | <0.0001 |
| 7127 | -0.03336 | -0.05451 to -0.01220   | Yes | **** | <0.0001 |
| 7128 | -0.05692 | -0.07807 to -0.03577   | Yes | **** | <0.0001 |
| 7129 | -0.03116 | -0.05231 to -0.01000   | Yes | **** | <0.0001 |
| 7130 | -0.09596 | -0.1171 to -0.07481    | Yes | **** | <0.0001 |
| 7140 | -0.02329 | -0.04444 to -0.002136  | Yes | **   | 0.0041  |
| 7147 | -0.03068 | -0.05183 to -0.009530  | Yes | **** | <0.0001 |
| 7148 | -0.05121 | -0.07236 to -0.03006   | Yes | **** | <0.0001 |
| 7149 | -0.03606 | -0.05722 to -0.01491   | Yes | **** | <0.0001 |
| 7150 | -0.04233 | -0.06348 to -0.02118   | Yes | **** | <0.0001 |
| 7151 | -0.0539  | -0.07505 to -0.03275   | Yes | **** | <0.0001 |

|      |          |                        |     |      |         |
|------|----------|------------------------|-----|------|---------|
| 7152 | -0.05752 | -0.07867 to -0.03637   | Yes | **** | <0.0001 |
| 7153 | -0.02337 | -0.04452 to -0.002214  | Yes | **   | 0.0037  |
| 7154 | -0.02968 | -0.05083 to -0.008530  | Yes | **** | <0.0001 |
| 7168 | -0.03262 | -0.05377 to -0.01147   | Yes | **** | <0.0001 |
| 7169 | -0.03401 | -0.05516 to -0.01286   | Yes | **** | <0.0001 |
| 7170 | -0.02538 | -0.04653 to -0.004228  | Yes | ***  | 0.0003  |
| 7270 | -0.02676 | -0.04791 to -0.005609  | Yes | **** | <0.0001 |
| 7271 | -0.057   | -0.07815 to -0.03585   | Yes | **** | <0.0001 |
| 7284 | -0.04345 | -0.06460 to -0.02229   | Yes | **** | <0.0001 |
| 7285 | -0.03221 | -0.05336 to -0.01106   | Yes | **** | <0.0001 |
| 7286 | -0.1055  | -0.1267 to -0.08436    | Yes | **** | <0.0001 |
| 7287 | -0.03837 | -0.05952 to -0.01722   | Yes | **** | <0.0001 |
| 7288 | -0.05666 | -0.07781 to -0.03551   | Yes | **** | <0.0001 |
| 7289 | -0.055   | -0.07615 to -0.03385   | Yes | **** | <0.0001 |
| 7304 | -0.05896 | -0.08011 to -0.03781   | Yes | **** | <0.0001 |
| 7308 | -0.02647 | -0.04762 to -0.005316  | Yes | **** | <0.0001 |
| 7309 | -0.02189 | -0.04304 to -0.0007396 | Yes | *    | 0.0217  |
| 7310 | -0.05254 | -0.07369 to -0.03139   | Yes | **** | <0.0001 |
| 7311 | -0.04958 | -0.07073 to -0.02843   | Yes | **** | <0.0001 |
| 7324 | -0.02779 | -0.04894 to -0.006640  | Yes | **** | <0.0001 |
| 7325 | -0.03488 | -0.05604 to -0.01373   | Yes | **** | <0.0001 |
| 7326 | -0.04331 | -0.06447 to -0.02216   | Yes | **** | <0.0001 |
| 7327 | -0.04009 | -0.06124 to -0.01894   | Yes | **** | <0.0001 |
| 7328 | -0.065   | -0.08615 to -0.04384   | Yes | **** | <0.0001 |
| 7329 | -0.04628 | -0.06743 to -0.02513   | Yes | **** | <0.0001 |
| 7331 | -0.05339 | -0.07454 to -0.03224   | Yes | **** | <0.0001 |
| 7332 | -0.0527  | -0.07385 to -0.03154   | Yes | **** | <0.0001 |
| 7333 | -0.1032  | -0.1243 to -0.08201    | Yes | **** | <0.0001 |
| 7334 | -0.07244 | -0.09359 to -0.05129   | Yes | **** | <0.0001 |
| 7335 | -0.0587  | -0.07985 to -0.03754   | Yes | **** | <0.0001 |
| 7336 | -0.06567 | -0.08682 to -0.04452   | Yes | **** | <0.0001 |
| 7337 | -0.05518 | -0.07633 to -0.03403   | Yes | **** | <0.0001 |
| 7354 | -0.025   | -0.04615 to -0.003848  | Yes | ***  | 0.0005  |
| 7366 | -0.02989 | -0.05104 to -0.008741  | Yes | **** | <0.0001 |
| 7379 | -0.02728 | -0.04843 to -0.006125  | Yes | **** | <0.0001 |
| 7380 | -0.04216 | -0.06331 to -0.02101   | Yes | **** | <0.0001 |
| 7381 | -0.0405  | -0.06165 to -0.01935   | Yes | **** | <0.0001 |
| 7382 | -0.02691 | -0.04806 to -0.005757  | Yes | **** | <0.0001 |
| 7383 | -0.02501 | -0.04616 to -0.003860  | Yes | ***  | 0.0005  |
| 7395 | -0.0223  | -0.04345 to -0.001146  | Yes | *    | 0.0135  |
| 7407 | -0.02998 | -0.05113 to -0.008833  | Yes | **** | <0.0001 |
| 7409 | -0.04789 | -0.06904 to -0.02674   | Yes | **** | <0.0001 |
| 7410 | -0.02908 | -0.05024 to -0.007933  | Yes | **** | <0.0001 |
| 7411 | -0.05542 | -0.07657 to -0.03426   | Yes | **** | <0.0001 |
| 7412 | -0.03673 | -0.05788 to -0.01558   | Yes | **** | <0.0001 |

nsp3

|      |          |                        |     |      |         |
|------|----------|------------------------|-----|------|---------|
| 7413 | -0.03534 | -0.05649 to -0.01419   | Yes | **** | <0.0001 |
| 7445 | -0.02687 | -0.04802 to -0.005718  | Yes | **** | <0.0001 |
| 7446 | -0.03879 | -0.05994 to -0.01764   | Yes | **** | <0.0001 |
| 7462 | -0.03432 | -0.05547 to -0.01317   | Yes | **** | <0.0001 |
| 7516 | -0.03249 | -0.05364 to -0.01134   | Yes | **** | <0.0001 |
| 7542 | -0.02986 | -0.05101 to -0.008710  | Yes | **** | <0.0001 |
| 7544 | -0.02688 | -0.04803 to -0.005725  | Yes | **** | <0.0001 |
| 7545 | -0.02277 | -0.04392 to -0.001617  | Yes | **   | 0.0077  |
| 7550 | -0.02713 | -0.04828 to -0.005978  | Yes | **** | <0.0001 |
| 7551 | -0.0325  | -0.05365 to -0.01135   | Yes | **** | <0.0001 |
| 7552 | -0.09178 | -0.1129 to -0.07063    | Yes | **** | <0.0001 |
| 7553 | -0.04327 | -0.06442 to -0.02212   | Yes | **** | <0.0001 |
| 7555 | -0.02629 | -0.04744 to -0.005139  | Yes | **** | <0.0001 |
| 7582 | -0.03067 | -0.05182 to -0.009520  | Yes | **** | <0.0001 |
| 7583 | -0.02466 | -0.04581 to -0.003507  | Yes | ***  | 0.0007  |
| 7584 | -0.03789 | -0.05904 to -0.01674   | Yes | **** | <0.0001 |
| 7586 | -0.05424 | -0.07539 to -0.03309   | Yes | **** | <0.0001 |
| 7587 | -0.02994 | -0.05109 to -0.008788  | Yes | **** | <0.0001 |
| 7609 | -0.02194 | -0.04309 to -0.0007877 | Yes | *    | 0.0205  |
| 7613 | -0.02639 | -0.04754 to -0.005237  | Yes | **** | <0.0001 |
| 7621 | -0.0262  | -0.04735 to -0.005050  | Yes | **** | <0.0001 |
| 7622 | -0.05952 | -0.08067 to -0.03837   | Yes | **** | <0.0001 |
| 7623 | -0.02537 | -0.04652 to -0.004220  | Yes | ***  | 0.0003  |
| 7624 | -0.04444 | -0.06559 to -0.02329   | Yes | **** | <0.0001 |
| 7625 | -0.02905 | -0.05020 to -0.007896  | Yes | **** | <0.0001 |
| 7637 | -0.03645 | -0.05760 to -0.01530   | Yes | **** | <0.0001 |
| 7648 | -0.06015 | -0.08130 to -0.03900   | Yes | **** | <0.0001 |
| 7649 | -0.02187 | -0.04302 to -0.0007198 | Yes | *    | 0.0222  |
| 7650 | -0.03144 | -0.05259 to -0.01028   | Yes | **** | <0.0001 |
| 7651 | -0.07104 | -0.09219 to -0.04989   | Yes | **** | <0.0001 |
| 7652 | -0.02893 | -0.05008 to -0.007778  | Yes | **** | <0.0001 |
| 7673 | -0.07428 | -0.09544 to -0.05313   | Yes | **** | <0.0001 |
| 7674 | -0.0554  | -0.07655 to -0.03425   | Yes | **** | <0.0001 |
| 7675 | -0.07874 | -0.09989 to -0.05759   | Yes | **** | <0.0001 |
| 7677 | -0.02474 | -0.04589 to -0.003592  | Yes | ***  | 0.0006  |
| 7680 | -0.02224 | -0.04339 to -0.001090  | Yes | *    | 0.0144  |
| 7685 | -0.05041 | -0.07156 to -0.02926   | Yes | **** | <0.0001 |
| 7686 | -0.03298 | -0.05413 to -0.01183   | Yes | **** | <0.0001 |
| 7687 | -0.02151 | -0.04266 to -0.0003594 | Yes | *    | 0.0335  |
| 7690 | -0.02631 | -0.04746 to -0.005154  | Yes | **** | <0.0001 |
| 7698 | -0.03587 | -0.05703 to -0.01472   | Yes | **** | <0.0001 |
| 7712 | -0.04845 | -0.06960 to -0.02730   | Yes | **** | <0.0001 |
| 7715 | -0.03703 | -0.05818 to -0.01588   | Yes | **** | <0.0001 |
| 7843 | -0.02619 | -0.04734 to -0.005040  | Yes | **** | <0.0001 |
| 7889 | -0.04056 | -0.06171 to -0.01941   | Yes | **** | <0.0001 |

|      |          |                        |     |      |         |
|------|----------|------------------------|-----|------|---------|
| 7890 | -0.06151 | -0.08266 to -0.04036   | Yes | **** | <0.0001 |
| 7907 | -0.02375 | -0.04490 to -0.002600  | Yes | **   | 0.0023  |
| 7908 | -0.03864 | -0.05979 to -0.01749   | Yes | **** | <0.0001 |
| 7978 | -0.02654 | -0.04769 to -0.005385  | Yes | **** | <0.0001 |
| 7980 | -0.02339 | -0.04454 to -0.002241  | Yes | **   | 0.0036  |
| 7981 | -0.03188 | -0.05303 to -0.01073   | Yes | **** | <0.0001 |
| 7982 | -0.04584 | -0.06699 to -0.02469   | Yes | **** | <0.0001 |
| 7988 | -0.02528 | -0.04643 to -0.004125  | Yes | ***  | 0.0003  |
| 7996 | -0.0231  | -0.04425 to -0.001948  | Yes | **   | 0.0051  |
| 7997 | -0.02229 | -0.04344 to -0.001135  | Yes | *    | 0.0137  |
| 7998 | -0.02568 | -0.04683 to -0.004529  | Yes | ***  | 0.0002  |
| 8005 | -0.0333  | -0.05445 to -0.01215   | Yes | **** | <0.0001 |
| 8006 | -0.05019 | -0.07134 to -0.02904   | Yes | **** | <0.0001 |
| 8007 | -0.06633 | -0.08748 to -0.04518   | Yes | **** | <0.0001 |
| 8008 | -0.05616 | -0.07731 to -0.03501   | Yes | **** | <0.0001 |
| 8009 | -0.09182 | -0.1130 to -0.07067    | Yes | **** | <0.0001 |
| 8010 | -0.07905 | -0.1002 to -0.05790    | Yes | **** | <0.0001 |
| 8033 | -0.02268 | -0.04384 to -0.001533  | Yes | **   | 0.0085  |
| 8034 | -0.02464 | -0.04579 to -0.003486  | Yes | ***  | 0.0007  |
| 8051 | -0.04299 | -0.06414 to -0.02184   | Yes | **** | <0.0001 |
| 8053 | -0.04014 | -0.06129 to -0.01899   | Yes | **** | <0.0001 |
| 8071 | -0.09458 | -0.1157 to -0.07343    | Yes | **** | <0.0001 |
| 8086 | -0.02584 | -0.04700 to -0.004694  | Yes | ***  | 0.0001  |
| 8089 | -0.02151 | -0.04266 to -0.0003608 | Yes | *    | 0.0334  |
| 8151 | -0.03261 | -0.05376 to -0.01145   | Yes | **** | <0.0001 |
| 8153 | -0.04015 | -0.06130 to -0.01900   | Yes | **** | <0.0001 |
| 8154 | -0.02621 | -0.04736 to -0.005057  | Yes | **** | <0.0001 |
| 8155 | -0.06462 | -0.08577 to -0.04347   | Yes | **** | <0.0001 |
| 8156 | -0.03587 | -0.05702 to -0.01472   | Yes | **** | <0.0001 |
| 8157 | -0.03002 | -0.05117 to -0.008865  | Yes | **** | <0.0001 |
| 8159 | -0.03818 | -0.05933 to -0.01703   | Yes | **** | <0.0001 |
| 8160 | -0.02532 | -0.04647 to -0.004164  | Yes | ***  | 0.0003  |
| 8170 | -0.02817 | -0.04932 to -0.007018  | Yes | **** | <0.0001 |
| 8195 | -0.02646 | -0.04761 to -0.005307  | Yes | **** | <0.0001 |
| 8197 | -0.04037 | -0.06152 to -0.01922   | Yes | **** | <0.0001 |
| 8355 | -0.02722 | -0.04837 to -0.006071  | Yes | **** | <0.0001 |
| 8361 | -0.02769 | -0.04884 to -0.006535  | Yes | **** | <0.0001 |
| 8381 | -0.0224  | -0.04356 to -0.001253  | Yes | *    | 0.0119  |
| 8462 | -0.04518 | -0.06633 to -0.02403   | Yes | **** | <0.0001 |
| 8464 | -0.0634  | -0.08456 to -0.04225   | Yes | **** | <0.0001 |
| 8465 | -0.07402 | -0.09517 to -0.05287   | Yes | **** | <0.0001 |
| 8466 | -0.05101 | -0.07216 to -0.02986   | Yes | **** | <0.0001 |
| 8467 | -0.03244 | -0.05359 to -0.01128   | Yes | **** | <0.0001 |
| 8469 | -0.0358  | -0.05695 to -0.01465   | Yes | **** | <0.0001 |
| 8471 | -0.04344 | -0.06459 to -0.02229   | Yes | **** | <0.0001 |

|      |          |                         |     |      |         |
|------|----------|-------------------------|-----|------|---------|
| 8484 | 0.02196  | 0.0008090 to 0.04311    | Yes | *    | 0.02    |
| 8511 | -0.03519 | -0.05634 to -0.01404    | Yes | **** | <0.0001 |
| 8513 | -0.02229 | -0.04344 to -0.001138   | Yes | *    | 0.0136  |
| 8515 | -0.02117 | -0.04232 to -2.131e-005 | Yes | *    | 0.0488  |
| 8518 | -0.02329 | -0.04444 to -0.002141   | Yes | **   | 0.0041  |
| 8520 | -0.04071 | -0.06186 to -0.01956    | Yes | **** | <0.0001 |
| 8537 | -0.07866 | -0.09981 to -0.05751    | Yes | **** | <0.0001 |
| 8538 | -0.04247 | -0.06362 to -0.02132    | Yes | **** | <0.0001 |
| 8539 | -0.05927 | -0.08042 to -0.03812    | Yes | **** | <0.0001 |
| 8543 | -0.09668 | -0.1178 to -0.07553     | Yes | **** | <0.0001 |
| 8544 | -0.03837 | -0.05952 to -0.01721    | Yes | **** | <0.0001 |
| 8545 | -0.0307  | -0.05186 to -0.009554   | Yes | **** | <0.0001 |
| 8546 | -0.03644 | -0.05759 to -0.01529    | Yes | **** | <0.0001 |
| 8547 | -0.02131 | -0.04246 to -0.0001601  | Yes | *    | 0.0419  |
| 8555 | -0.04811 | -0.06927 to -0.02696    | Yes | **** | <0.0001 |
| 8595 | -0.02139 | -0.04254 to -0.0002387  | Yes | *    | 0.0384  |
| 8606 | -0.02817 | -0.04932 to -0.007020   | Yes | **** | <0.0001 |
| 8629 | -0.0271  | -0.04825 to -0.005948   | Yes | **** | <0.0001 |
| 8640 | -0.02382 | -0.04497 to -0.002671   | Yes | **   | 0.0021  |
| 8733 | -0.03537 | -0.05652 to -0.01422    | Yes | **** | <0.0001 |
| 8746 | -0.03471 | -0.05586 to -0.01356    | Yes | **** | <0.0001 |
| 8749 | -0.03566 | -0.05681 to -0.01450    | Yes | **** | <0.0001 |
| 8750 | -0.0685  | -0.08965 to -0.04735    | Yes | **** | <0.0001 |
| 8751 | -0.0579  | -0.07906 to -0.03675    | Yes | **** | <0.0001 |
| 8752 | -0.03688 | -0.05803 to -0.01573    | Yes | **** | <0.0001 |
| 8753 | -0.03972 | -0.06087 to -0.01857    | Yes | **** | <0.0001 |
| 8754 | -0.04239 | -0.06354 to -0.02124    | Yes | **** | <0.0001 |
| 8755 | -0.03448 | -0.05563 to -0.01333    | Yes | **** | <0.0001 |
| 8772 | -0.03138 | -0.05253 to -0.01023    | Yes | **** | <0.0001 |
| 8773 | -0.02408 | -0.04523 to -0.002928   | Yes | **   | 0.0015  |
| 8860 | -0.02598 | -0.04714 to -0.004833   | Yes | ***  | 0.0001  |
| 8863 | -0.04012 | -0.06127 to -0.01897    | Yes | **** | <0.0001 |
| 8864 | -0.02596 | -0.04711 to -0.004809   | Yes | ***  | 0.0001  |
| 8887 | -0.02241 | -0.04357 to -0.001264   | Yes | *    | 0.0117  |
| 8888 | -0.03406 | -0.05521 to -0.01291    | Yes | **** | <0.0001 |
| 8889 | -0.03889 | -0.06004 to -0.01774    | Yes | **** | <0.0001 |
| 8890 | -0.03373 | -0.05488 to -0.01258    | Yes | **** | <0.0001 |
| 8891 | -0.03948 | -0.06063 to -0.01833    | Yes | **** | <0.0001 |
| 8916 | -0.0374  | -0.05855 to -0.01625    | Yes | **** | <0.0001 |
| 8923 | -0.03446 | -0.05561 to -0.01331    | Yes | **** | <0.0001 |
| 8924 | -0.05982 | -0.08097 to -0.03867    | Yes | **** | <0.0001 |
| 8925 | -0.04301 | -0.06416 to -0.02186    | Yes | **** | <0.0001 |
| 8926 | -0.05194 | -0.07310 to -0.03079    | Yes | **** | <0.0001 |
| 8927 | -0.05873 | -0.07988 to -0.03758    | Yes | **** | <0.0001 |
| 8928 | -0.02793 | -0.04908 to -0.006778   | Yes | **** | <0.0001 |

|      |          |                         |     |      |         |
|------|----------|-------------------------|-----|------|---------|
| 8929 | -0.02625 | -0.04740 to -0.005099   | Yes | **** | <0.0001 |
| 8930 | -0.0594  | -0.08055 to -0.03825    | Yes | **** | <0.0001 |
| 8931 | -0.04812 | -0.06927 to -0.02697    | Yes | **** | <0.0001 |
| 8932 | -0.0608  | -0.08195 to -0.03965    | Yes | **** | <0.0001 |
| 8938 | -0.05169 | -0.07284 to -0.03054    | Yes | **** | <0.0001 |
| 8942 | -0.02598 | -0.04713 to -0.004825   | Yes | ***  | 0.0001  |
| 8943 | -0.04028 | -0.06143 to -0.01913    | Yes | **** | <0.0001 |
| 8944 | -0.02979 | -0.05094 to -0.008641   | Yes | **** | <0.0001 |
| 8945 | -0.06303 | -0.08418 to -0.04188    | Yes | **** | <0.0001 |
| 8946 | -0.06804 | -0.08920 to -0.04689    | Yes | **** | <0.0001 |
| 8947 | -0.0479  | -0.06905 to -0.02675    | Yes | **** | <0.0001 |
| 8948 | -0.102   | -0.1232 to -0.08085     | Yes | **** | <0.0001 |
| 8949 | -0.09519 | -0.1163 to -0.07404     | Yes | **** | <0.0001 |
| 8950 | -0.02447 | -0.04562 to -0.003321   | Yes | ***  | 0.0009  |
| 8972 | -0.02443 | -0.04558 to -0.003275   | Yes | ***  | 0.001   |
| 8980 | -0.0297  | -0.05085 to -0.008547   | Yes | **** | <0.0001 |
| 8981 | -0.06352 | -0.08467 to -0.04237    | Yes | **** | <0.0001 |
| 8989 | -0.05412 | -0.07527 to -0.03297    | Yes | **** | <0.0001 |
| 9046 | -0.04673 | -0.06788 to -0.02558    | Yes | **** | <0.0001 |
| 9047 | -0.04391 | -0.06506 to -0.02276    | Yes | **** | <0.0001 |
| 9048 | -0.0308  | -0.05196 to -0.009653   | Yes | **** | <0.0001 |
| 9049 | -0.03378 | -0.05493 to -0.01263    | Yes | **** | <0.0001 |
| 9050 | -0.03882 | -0.05997 to -0.01767    | Yes | **** | <0.0001 |
| 9051 | -0.02864 | -0.04979 to -0.007484   | Yes | **** | <0.0001 |
| 9052 | -0.03297 | -0.05412 to -0.01182    | Yes | **** | <0.0001 |
| 9055 | -0.0313  | -0.05246 to -0.01015    | Yes | **** | <0.0001 |
| 9056 | -0.04194 | -0.06309 to -0.02078    | Yes | **** | <0.0001 |
| 9076 | -0.04333 | -0.06448 to -0.02218    | Yes | **** | <0.0001 |
| 9077 | -0.02411 | -0.04526 to -0.002958   | Yes | **   | 0.0015  |
| 9083 | -0.02895 | -0.05010 to -0.007803   | Yes | **** | <0.0001 |
| 9091 | -0.02908 | -0.05024 to -0.007934   | Yes | **** | <0.0001 |
| 9092 | -0.03644 | -0.05760 to -0.01529    | Yes | **** | <0.0001 |
| 9098 | -0.03633 | -0.05748 to -0.01517    | Yes | **** | <0.0001 |
| 9100 | -0.0212  | -0.04235 to -4.712e-005 | Yes | *    | 0.0475  |
| 9101 | -0.0668  | -0.08795 to -0.04565    | Yes | **** | <0.0001 |
| 9146 | -0.02631 | -0.04746 to -0.005155   | Yes | **** | <0.0001 |
| 9150 | -0.03413 | -0.05528 to -0.01297    | Yes | **** | <0.0001 |
| 9152 | -0.03293 | -0.05408 to -0.01178    | Yes | **** | <0.0001 |
| 9155 | -0.02628 | -0.04743 to -0.005128   | Yes | **** | <0.0001 |
| 9157 | -0.02582 | -0.04697 to -0.004669   | Yes | ***  | 0.0002  |
| 9168 | -0.02359 | -0.04474 to -0.002439   | Yes | **   | 0.0028  |
| 9170 | -0.02504 | -0.04619 to -0.003885   | Yes | ***  | 0.0004  |
| 9173 | -0.02116 | -0.04231 to -1.271e-005 | Yes | *    | 0.0493  |
| 9183 | -0.03816 | -0.05931 to -0.01701    | Yes | **** | <0.0001 |
| 9185 | -0.02745 | -0.04860 to -0.006299   | Yes | **** | <0.0001 |

|       |          |                        |     |      |         |           |
|-------|----------|------------------------|-----|------|---------|-----------|
| 9222  | -0.02647 | -0.04762 to -0.005318  | Yes | **** | <0.0001 |           |
| 9299  | -0.03896 | -0.06011 to -0.01781   | Yes | **** | <0.0001 |           |
| 9481  | -0.02651 | -0.04766 to -0.005358  | Yes | **** | <0.0001 |           |
| 9482  | -0.03008 | -0.05123 to -0.008929  | Yes | **** | <0.0001 |           |
| 9512  | -0.03115 | -0.05230 to -0.009999  | Yes | **** | <0.0001 |           |
| 9527  | -0.02349 | -0.04465 to -0.002343  | Yes | **   | 0.0032  |           |
| 9528  | -0.02255 | -0.04370 to -0.001399  | Yes | **   | 0.01    |           |
| 9529  | -0.02627 | -0.04742 to -0.005120  | Yes | **** | <0.0001 |           |
| 9544  | -0.02579 | -0.04694 to -0.004642  | Yes | ***  | 0.0002  |           |
| 9558  | -0.02399 | -0.04514 to -0.002839  | Yes | **   | 0.0017  |           |
| 9754  | -0.02574 | -0.04689 to -0.004589  | Yes | ***  | 0.0002  |           |
| 9843  | -0.03282 | -0.05397 to -0.01166   | Yes | **** | <0.0001 |           |
| 9887  | -0.02275 | -0.04390 to -0.001599  | Yes | **   | 0.0079  | nsp4      |
| 9995  | -0.02269 | -0.04384 to -0.001539  | Yes | **   | 0.0085  |           |
| 10012 | -0.02165 | -0.04280 to -0.0005022 | Yes | *    | 0.0285  |           |
| 13604 | 0.03014  | 0.008984 to 0.05129    | Yes | **** | <0.0001 | nsp9      |
| 14621 | -0.04515 | -0.06630 to -0.02400   | Yes | **** | <0.0001 |           |
| 14814 | 0.06111  | 0.03996 to 0.08226     | Yes | **** | <0.0001 | nsp12     |
| 16005 | -0.02928 | -0.05043 to -0.008128  | Yes | **** | <0.0001 |           |
| 16880 | 0.1156   | 0.09441 to 0.1367      | Yes | **** | <0.0001 | nsp13     |
| 17764 | 0.0471   | 0.02595 to 0.06825     | Yes | **** | <0.0001 |           |
| 18914 | 0.02452  | 0.003370 to 0.04567    | Yes | ***  | 0.0009  | nsp14     |
| 18927 | 0.03855  | 0.01740 to 0.05970     | Yes | **** | <0.0001 |           |
| 20131 | 0.03177  | 0.01062 to 0.05292     | Yes | **** | <0.0001 | nsp15     |
| 21751 | 0.2539   | 0.2327 to 0.2750       | Yes | **** | <0.0001 | TRS-2     |
| 22480 | 0.03223  | 0.01108 to 0.05338     | Yes | **** | <0.0001 | ORF2a     |
| 23929 | 0.1846   | 0.1634 to 0.2057       | Yes | **** | <0.0001 | TRS-3     |
| 25941 | 0.02265  | 0.001503 to 0.04380    | Yes | **   | 0.0088  |           |
| 26719 | 0.02223  | 0.001075 to 0.04338    | Yes | *    | 0.0147  |           |
| 26765 | 0.02238  | 0.001228 to 0.04353    | Yes | *    | 0.0122  | S protein |
| 27865 | -0.02556 | -0.04671 to -0.004412  | Yes | ***  | 0.0002  |           |
| 27923 | -0.0398  | -0.06095 to -0.01865   | Yes | **** | <0.0001 |           |
| 27925 | 0.04484  | 0.02369 to 0.06600     | Yes | **** | <0.0001 |           |
| 27934 | 0.04547  | 0.02432 to 0.06662     | Yes | **** | <0.0001 |           |
| 27935 | 0.02684  | 0.005693 to 0.04799    | Yes | **** | <0.0001 | TRS-4     |
| 27942 | 0.2121   | 0.1909 to 0.2332       | Yes | **** | <0.0001 |           |
| 28102 | 0.02876  | 0.007610 to 0.04991    | Yes | **** | <0.0001 | ORF4b     |
| 28120 | 0.0282   | 0.007049 to 0.04935    | Yes | **** | <0.0001 | TRS-5     |
| 28325 | 0.2053   | 0.1842 to 0.2265       | Yes | **** | <0.0001 |           |
| 28511 | 0.02163  | 0.0004813 to 0.04278   | Yes | *    | 0.0292  |           |
| 28704 | 0.02141  | 0.0002565 to 0.04256   | Yes | *    | 0.0376  | ORF5a     |
| 28953 | 0.03448  | 0.01333 to 0.05563     | Yes | **** | <0.0001 |           |
| 28958 | 0.5344   | 0.5133 to 0.5556       | Yes | **** | <0.0001 | TRS-6     |
| 28960 | 0.3489   | 0.3278 to 0.3701       | Yes | **** | <0.0001 |           |
| 29268 | 0.07755  | 0.05640 to 0.09870     | Yes | **** | <0.0001 |           |

|       |          |                      |     |      |         |           |
|-------|----------|----------------------|-----|------|---------|-----------|
| 29347 | 0.07747  | 0.05632 to 0.09862   | Yes | **** | <0.0001 | M protein |
| 29650 | 0.02724  | 0.006087 to 0.04839  | Yes | **** | <0.0001 |           |
| 29655 | 0.03687  | 0.01572 to 0.05802   | Yes | **** | <0.0001 | TRS-7     |
| 29666 | 0.1709   | 0.1498 to 0.1921     | Yes | **** | <0.0001 | N protein |
| 31327 | -0.03401 | -0.05516 to -0.01286 | Yes | **** | <0.0001 | 3' UTR    |
